# Supplementary material for: Magnesium increases numbers of Foxp3+ Treg cells and reduces arthritis severity and joint damage in an IL-10-dependent manner mediated by the intestinal microbiome
Source: PubMed Central journal article supplement — eBioMedicine. 2023 May 16;92:104603. doi: 10.1016/j.ebiom.2023.104603 (PMC10203746; doi:10.1016/j.ebiom.2023.104603), 2023-05-16
Supplement: mmc1.pdf [file mmc1.pdf]

**Supplemental Table 1.** Joint histology scoring system.

|       |   | <b>Synovial Inflammation<br/>(0-4)</b>                          | <b>Synovial Hyperplasia<br/>(0-3)</b>                                                                      | <b>Cartilage Erosion<br/>(0-4)</b> | <b>Bone Erosion<br/>(0-4)</b> |
|-------|---|-----------------------------------------------------------------|------------------------------------------------------------------------------------------------------------|------------------------------------|-------------------------------|
| Score | 0 | No inflammatory cells                                           | Normal (no inflammatory cells in the joint cavity)                                                         | no loss                            | Normal                        |
|       | 1 | Mild infiltration of inflammatory cells in periarticular tissue | Mild synovial hypertrophy (< 5 cell layers) with few inflammatory cells                                    | <10% loss                          | Minimal erosion               |
|       | 2 | Mild inflammation/edema                                         | Moderate synovial hypertrophy (< 20 cell layers) with accumulation of inflammatory cells into joint cavity | 10-50% loss                        | Multiple erosion              |
|       | 3 | Marked infiltration/edema                                       | Joint cavity totally filled with inflammatory cells                                                        | 50-80% loss                        | Cells enter bone (minimal)    |
|       | 4 | Severe infiltration/edema                                       |                                                                                                            | 80-100% loss                       | Cells enter bone (marked)     |
