# Supplementary material for: Magnesium increases numbers of Foxp3+ Treg cells and reduces arthritis severity and joint damage in an IL-10-dependent manner mediated by the intestinal microbiome
Source: PubMed Central journal article supplement — eBioMedicine. 2023 May 16;92:104603. doi: 10.1016/j.ebiom.2023.104603 (PMC10203746; doi:10.1016/j.ebiom.2023.104603), 2023-05-16
Supplement: mmc2.pdf [file mmc2.pdf]

**Supplemental Table 2.** Primers used for qPCR analyses of synovial tissues, spleens, intestines and fecal material.

| Gene                         | Gene Accession number   | Forward                 | Reverse                   |
|------------------------------|-------------------------|-------------------------|---------------------------|
| <b>βActin</b>                | NM_007393               | GGCTGTATCCCCTCCATCG     | CCAGTTGGTAACAATGCCATGT    |
| <b>CCR6</b>                  | NM_001190333            | CCCAGCTTGGAGCAGAATAGC   | TGATGACTTCGAACTGCAGGTT    |
| <b>FOXP3</b>                 | NM_001199347            | CCCTGCCCTTGACCTCAA      | GCCTCAGTCTCATGGTTTTGG     |
| <b>IL1β</b>                  | NM_008361               | CACAGCAGCACATCAACAAG    | GTGCTCATGTCCTCATCCTG      |
| <b>IL6</b>                   | NM_031168               | CTCTGGGAAATCGTGGAAAT    | CCAGTTTGGTAGCATCCATC      |
| <b>IL10</b>                  | NM_010548.2             | TGGCCCAGAAATCAAGGAGC    | CAGCAGACTCAATACACACT      |
| <b>IL17</b>                  | NM_010552               | CATGAGTCCAGGGAGAGCTT    | GCTGAGCTTTGAGGGATGAT      |
| <b>IL23</b>                  | NM_144548.1             | GGATGGCTGAACTCTTGTTTT   | GGCACACACCTTTAATCTAGCA    |
| <b>IL23r</b>                 | NM_144548               | TTCAGATGGGCATGAATGTTTCT | CCAAATCCGAGCTGTTGTTCTAT   |
| <b>CXCL10</b>                | NM_021274               | CCTCTCTCCATCACTCCCCTTT  | CGGCTGGTCACCTTTCAGA       |
| <b>MMP2</b>                  | NM_008610               | GGACCCCGGTTTCCCTAA      | CAGGTTATCAGGGATGGCATT     |
| <b>MMP3</b>                  | NM_010809.2             | ACTCTACCACTCAGCCAAGG    | TCCAGAGAGTTAGACTTGGTGG    |
| <b>MMP14</b>                 | NM_008608.4             | CTTGGTGGCTGTGCATGAGT    | CGGAGGGATCATTGGAATGT      |
| <b>RORA</b>                  | NM_001289916.1          | CAGATAACGTGGCAGACCTTC   | AGCTGCCACATCACCTCTCT      |
| <b>RORC</b>                  | NM_011281               | GCAGAACTGCCCCATTGA      | GACATTGCGCCAAACTTGA       |
| <b>STAT3</b>                 | NM_213659.2             | CAATACCATTGACCTGCCGAT   | GAGCGACTCAAACCTGCCCT      |
| <b>TNFα</b>                  | NM_013693               | ATGAGAAGTCCCAAATGGC     | CTCCACTTGGTGGTTTGCTA      |
| <b>CNNM2</b>                 | NM_001102471            | GCTTGTGAACCCGAAGTAAAGA  | ACACGTCGTTCGTATCCTCCA     |
| <b>MAGT1</b>                 | NM_001190409            | GAGAGAAGCGTGAACATGGC    | TTATTGGCCCATCCATCAGC      |
| <b>TRPM6</b>                 | NM_153417               | TCTGCCACAATTTAGTCAGGTG  | TGGTGCCGAAGGTATCTGTAG     |
| <b>TRPM7</b>                 | NM_021450               | AGGATGTCAGATTTGTCAGCAAC | CCTGGTTAAAGTGTTCACCCAA    |
| <b>TUSC3</b>                 | NM_030254               | TTGCGCTACCTGCCTACTG     | CTGCTCCACTTTTTTCAGCCAA    |
| <b>SLC41A1</b>               | NM_173865               | TACTGGCCCTACTCCTTCTCC   | GGGACTCAATCACTACCACCTC    |
| <b>SLC41A2</b>               | NM_177388               | CTTCAGCAAGAGATCAGAGCC   | CCAGCATAGTCATCGTACTTGG    |
| <b>Bacterioidis fragilis</b> | Reference <sup>89</sup> | TTGTGAAAGTTTGCGGCTC     | GGACTACCAGGTATCTAATCCTGTT |
| <b>Eubacterium</b>           | Reference <sup>90</sup> | CTCCTACGGGAGGCAGCAGT    | ATTACCGCGGCTGCTGCG        |
