# Supplementary material for: Magnesium increases numbers of Foxp3+ Treg cells and reduces arthritis severity and joint damage in an IL-10-dependent manner mediated by the intestinal microbiome
Source: PubMed Central journal article supplement — eBioMedicine. 2023 May 16;92:104603. doi: 10.1016/j.ebiom.2023.104603 (PMC10203746; doi:10.1016/j.ebiom.2023.104603), 2023-05-16
Supplement: mmc3.pdf [file mmc3.pdf]

**Supplementary table 3 - 313 significantly differentially represented metagenomic pathways between Mg2800 and Mg500 FMT recipients\*.**

| ID number                                                | Pathway description                                                                                         | Source   | p-value  | Mg2800_abundance | Mg500_abundance | fold_difference |
|----------------------------------------------------------|-------------------------------------------------------------------------------------------------------------|----------|----------|------------------|-----------------|-----------------|
| <b>Increased abundance in recipients from Mg2800 FMT</b> |                                                                                                             |          |          |                  |                 |                 |
| K03519                                                   | coxM, cutM; aerobic carbon-monoxide dehydrogenase medium subunit [EC:1.2.5.3]                               | KO       | 0.002052 | 1140.857         | 16.889          | 67.551          |
| K08323                                                   | rspA, manD; mannonate dehydratase [EC:4.2.1.8]                                                              | KO       | 0.002178 | 2196.714         | 43.333          | 50.693          |
| K08322                                                   | rspB; L-gulonate 5-dehydrogenase [EC:1.1.1.380]                                                             | KO       | 0.000978 | 1663.000         | 42.333          | 39.283          |
| EC:2.5.1.26                                              | Alkylglycerone-phosphate synthase                                                                           | EC       | 0.000832 | 21.500           | 0.611           | 35.182          |
| K00803                                                   | AGPS, agpS; alkyldihydroxyacetonephosphate synthase [EC:2.5.1.26]                                           | KO       | 0.000832 | 21.500           | 0.611           | 35.182          |
| K05780                                                   | phnL; alpha-D-ribose 1-methylphosphonate 5-triphosphate synthase subunit PhnL [EC:2.7.8.37]                 | KO       | 0.000954 | 21.500           | 0.611           | 35.182          |
| K05781                                                   | phnK; putative phosphonate transport system ATP-binding protein                                             | KO       | 0.000954 | 21.500           | 0.611           | 35.182          |
| K06162                                                   | phnM; alpha-D-ribose 1-methylphosphonate 5-triphosphate diphosphatase [EC:3.6.1.63]                         | KO       | 0.000954 | 21.500           | 0.611           | 35.182          |
| K06163                                                   | phnJ; alpha-D-ribose 1-methylphosphonate 5-phosphate C-P lyase [EC:4.7.1.1]                                 | KO       | 0.000954 | 21.500           | 0.611           | 35.182          |
| K06164                                                   | phnI; alpha-D-ribose 1-methylphosphonate 5-triphosphate synthase subunit PhnI [EC:2.7.8.37]                 | KO       | 0.000954 | 21.500           | 0.611           | 35.182          |
| K06165                                                   | phnH; alpha-D-ribose 1-methylphosphonate 5-triphosphate synthase subunit PhnH [EC:2.7.8.37]                 | KO       | 0.000954 | 21.500           | 0.611           | 35.182          |
| K06166                                                   | phnG; alpha-D-ribose 1-methylphosphonate 5-triphosphate synthase subunit PhnG [EC:2.7.8.37]                 | KO       | 0.000954 | 21.500           | 0.611           | 35.182          |
| EC:1.1.1.28†                                             | D-arabinitol dehydrogenase (NADP+)                                                                          | EC       | 0.000959 | 41.857           | 1.222           | 34.247          |
| EC:2.7.1.16†                                             | Glycerate 2-kinase                                                                                          | EC       | 0.000959 | 20.929           | 0.611           | 34.247          |
| EC:3.6.3.36                                              | Taurine-transporting ATPase                                                                                 | EC       | 0.000959 | 20.929           | 0.611           | 34.247          |
| EC:4.1.1.46                                              | o-pyrocatechuate decarboxylase                                                                              | EC       | 0.000959 | 20.929           | 0.611           | 34.247          |
| K01820                                                   | rhaA; L-rhamnose isomerase / sugar isomerase [EC:5.3.1.14 5.3.1.-]                                          | KO       | 0.000959 | 20.929           | 0.611           | 34.247          |
| K06121                                                   | dhbC; glycerol dehydratase medium subunit [EC:4.2.1.30]                                                     | KO       | 0.000959 | 20.929           | 0.611           | 34.247          |
| K10831                                                   | tauB; taurine transport system ATP-binding protein [EC:3.6.3.36]                                            | KO       | 0.000959 | 20.929           | 0.611           | 34.247          |
| K11529                                                   | gck, gckA, GLYCK; glycerate 2-kinase [EC:2.7.1.165]                                                         | KO       | 0.000959 | 20.929           | 0.611           | 34.247          |
| K11922                                                   | mngR, farR; GntR family transcriptional regulator, mannosyl-D-glycerate transport/metabolism system repress | KO       | 0.000959 | 20.929           | 0.611           | 34.247          |
| K12997                                                   | rgpB; rhamnosyltransferase [EC:2.4.1.-]                                                                     | KO       | 0.000959 | 20.929           | 0.611           | 34.247          |
| K14333                                                   | DHBD; 2,3-dihydroxybenzoate decarboxylase [EC:4.1.1.46]                                                     | KO       | 0.000959 | 20.929           | 0.611           | 34.247          |
| K14988                                                   | salK; two-component system, NarL family, secretion system sensor histidine kinase SalK                      | KO       | 0.000959 | 20.929           | 0.611           | 34.247          |
| K14989                                                   | salR; two-component system, NarL family, secretion system response regulator SalR                           | KO       | 0.000959 | 20.929           | 0.611           | 34.247          |
| K15654                                                   | surFA, IchAA; surfactin family lipopeptide synthetase A                                                     | KO       | 0.000959 | 20.929           | 0.611           | 34.247          |
| K17331                                                   | dasC; N,N'-diacetylchitobiose transport system permease protein                                             | KO       | 0.000959 | 20.929           | 0.611           | 34.247          |
| K17818                                                   | ARD1; D-arabinitol dehydrogenase (NADP+) [EC:1.1.1.287]                                                     | KO       | 0.000959 | 41.857           | 1.222           | 34.247          |
| K18282                                                   | cynD; cyanide dihydratase [EC:3.5.5.-]                                                                      | KO       | 0.000959 | 20.929           | 0.611           | 34.247          |
| K18427                                                   | hpdB; 4-hydroxyphenylacetate decarboxylase large subunit [EC:4.1.1.83]                                      | KO       | 0.000959 | 83.714           | 2.444           | 34.247          |
| K18428                                                   | hpdC; 4-hydroxyphenylacetate decarboxylase small subunit [EC:4.1.1.83]                                      | KO       | 0.000959 | 41.857           | 1.222           | 34.247          |
| K19076                                                   | cmr2, cas10; CRISPR-associated protein Cmr2                                                                 | KO       | 0.000959 | 20.929           | 0.611           | 34.247          |
| K19141                                                   | cmr5; CRISPR-associated protein Cmr5                                                                        | KO       | 0.000959 | 20.929           | 0.611           | 34.247          |
| EC:4.1.1.83                                              | 4-hydroxyphenylacetate decarboxylase                                                                        | EC       | 0.000959 | 125.571          | 3.667           | 34.247          |
| K16951                                                   | asrB; anaerobic sulfite reductase subunit B                                                                 | KO       | 0.001309 | 1273.071         | 39.028          | 32.620          |
| EC:1.2.1.27                                              | Methylmalonate-semialdehyde dehydrogenase (CoA acylating)                                                   | EC       | 0.000833 | 588.571          | 24.333          | 24.188          |
| K00140                                                   | mmsA, iolA, ALDH6A1; malonate-semialdehyde dehydrogenase (acylating) / methylmalonate-semialdehyde          | KO       | 0.000833 | 588.571          | 24.333          | 24.188          |
| K00385                                                   | asrC; anaerobic sulfite reductase subunit C                                                                 | KO       | 0.001052 | 744.500          | 32.694          | 22.771          |
| K16950                                                   | asrA; anaerobic sulfite reductase subunit A                                                                 | KO       | 0.001052 | 744.500          | 32.694          | 22.771          |
| K19333                                                   | kdgR; iclR family transcriptional regulator, KDG regulon repressor                                          | KO       | 0.000465 | 621.500          | 27.611          | 22.509          |
| K03476                                                   | ulaG; L-ascorbate 6-phosphate lactonase [EC:3.1.1.-]                                                        | KO       | 0.000825 | 1771.643         | 81.100          | 21.845          |
| K05396                                                   | dcyD; D-cysteine desulfhydrase [EC:4.4.1.15]                                                                | KO       | 0.000731 | 710.571          | 38.111          | 18.645          |
| K10537                                                   | araF; L-arabinose transport system substrate-binding protein                                                | KO       | 0.000783 | 25.214           | 1.389           | 18.154          |
| K03338                                                   | iolC; 5-dehydro-2-deoxygluconokinase [EC:2.7.1.92]                                                          | KO       | 0.000517 | 822.786          | 56.333          | 14.606          |
| K00073                                                   | aID; ureidoglycolate dehydrogenase (NAD+) [EC:1.1.1.350]                                                    | KO       | 0.002182 | 680.714          | 51.444          | 13.232          |
| K01436                                                   | KO1436; amidohydrolase [EC:3.5.1.-]                                                                         | KO       | 0.001916 | 885.094          | 68.306          | 12.958          |
| EC:1.1.1.12†                                             | 2-deoxy-D-gluconate 3-dehydrogenase                                                                         | EC       | 0.000804 | 1464.786         | 133.944         | 10.936          |
| K00065                                                   | kduD; 2-dehydro-3-deoxy-D-gluconate 5-dehydrogenase [EC:1.1.1.127]                                          | KO       | 0.000804 | 1464.786         | 133.944         | 10.936          |
| K01060                                                   | cah; cephalosporin-C deacetylase [EC:3.1.1.41]                                                              | KO       | 0.000760 | 1249.286         | 114.889         | 10.874          |
| K03300                                                   | TC.CITMHS; citrate-Mg2+-H+ or citrate-Ca2+-H+ symporter, CitMHS family                                      | KO       | 0.000711 | 143.000          | 14.222          | 10.055          |
| K13016                                                   | wbpB; UDP-N-acetyl-2-amino-2-deoxyglucuronate dehydrogenase [EC:1.1.1.335]                                  | KO       | 0.000016 | 425.951          | 49.222          | 8.654           |
| EC:2.7.1.29                                              | Glycerone kinase                                                                                            | EC       | 0.000255 | 791.571          | 107.417         | 7.369           |
| K00863                                                   | DAK, TKFC; triose/dihydroxyacetone kinase / FAD-AMP lyase (cyclizing) [EC:2.7.1.28 2.7.1.29 4.6.1.15]       | KO       | 0.000255 | 791.571          | 107.417         | 7.369           |
| K03388                                                   | hdrA2; heterodisulfide reductase subunit A2 [EC:1.8.7.3 1.8.98.4 1.8.98.5 1.8.98.6]                         | KO       | 0.000388 | 2809.951         | 453.889         | 6.191           |
| EC:2.7.1.16                                              | Ribulokinase                                                                                                | EC       | 0.000244 | 1601.857         | 279.667         | 5.728           |
| K00853                                                   | araB; L-ribulokinase [EC:2.7.1.16]                                                                          | KO       | 0.000244 | 1601.857         | 279.667         | 5.728           |
| K01644                                                   | citE; citrate lyase subunit beta / citryl-CoA lyase [EC:4.1.3.34]                                           | KO       | 0.001825 | 2176.143         | 389.889         | 5.581           |
| K15922                                                   | yihQ; sulfoquinovosidase [EC:3.2.1.199]                                                                     | KO       | 0.001560 | 97.286           | 18.000          | 5.405           |
| EC:1.8.98.1                                              | CoB-CoM heterodisulfide reductase                                                                           | EC       | 0.000104 | 6844.140         | 1342.667        | 5.097           |
| K03389                                                   | hdrB2; heterodisulfide reductase subunit B2 [EC:1.8.7.3 1.8.98.4 1.8.98.5 1.8.98.6]                         | KO       | 0.000104 | 2281.380         | 447.556         | 5.097           |
| K13953                                                   | adhP; alcohol dehydrogenase, propanol-preferring [EC:1.1.1.1]                                               | KO       | 0.001333 | 1304.143         | 273.222         | 4.773           |
| K02747                                                   | PTS-Aga-EIID, agaE; PTS system, N-acetylgalactosamine-specific IID component                                | KO       | 0.002003 | 296.857          | 65.028          | 4.565           |
| K01730                                                   | ogl; oligogalacturonide lyase [EC:4.2.2.6]                                                                  | KO       | 0.001923 | 4610.286         | 1044.667        | 4.413           |
| K13002                                                   | wbyL; glycosyltransferase [EC:2.4.1.-]                                                                      | KO       | 0.001923 | 4610.286         | 1044.667        | 4.413           |
| K13581                                                   | ccrM; modification methylase [EC:2.1.1.72]                                                                  | KO       | 0.001923 | 4610.286         | 1044.667        | 4.413           |
| K01643                                                   | citF; citrate lyase subunit alpha / citrate CoA-transferase [EC:2.8.3.10]                                   | KO       | 0.001530 | 1647.571         | 376.556         | 4.375           |
| K18148                                                   | rtcB; release factor H-coupled RctB family protein                                                          | KO       | 0.001378 | 105.143          | 25.000          | 4.206           |
| K02022                                                   | ABC.MR.TX; HlyD family secretion protein                                                                    | KO       | 0.001829 | 4837.771         | 1162.267        | 4.162           |
| EC:6.2.1.22                                              | [Citrate (pro-3S)-lyase] ligase                                                                             | EC       | 0.001685 | 1562.857         | 376.556         | 4.150           |
| K01910                                                   | citC; [citrate (pro-3S)-lyase] ligase [EC:6.2.1.22]                                                         | KO       | 0.001685 | 1562.857         | 376.556         | 4.150           |
| K08676                                                   | tri; tricorn protease [EC:3.4.21.-]                                                                         | KO       | 0.000744 | 5025.923         | 1216.922        | 4.130           |
| K14977                                                   | yIbA, UGHY; (S)-ureidoglycine aminohydrolase [EC:3.5.3.26]                                                  | KO       | 0.000309 | 104.429          | 25.444          | 4.104           |
| K13927                                                   | citXG; holo-ACP synthase / triphosphoribosyl-dephospho-CoA synthase [EC:2.7.7.61 2.4.2.52]                  | KO       | 0.001564 | 973.429          | 243.111         | 4.004           |
| K03390                                                   | hdrC2; heterodisulfide reductase subunit C2 [EC:1.8.7.3 1.8.98.4 1.8.98.5 1.8.98.6]                         | KO       | 0.000014 | 1752.809         | 441.222         | 3.973           |
| EC:4.2.2.23                                              | Rhamnogalacturonan endolyase                                                                                | EC       | 0.001934 | 10086.714        | 2573.111        | 3.920           |
| K18197                                                   | yesW; rhamnogalacturonan endolyase [EC:4.2.2.23]                                                            | KO       | 0.001934 | 10086.714        | 2573.111        | 3.920           |
| K03931                                                   | ygjK; putative isomerase                                                                                    | KO       | 0.001928 | 10093.571        | 2593.156        | 3.892           |
| PWY-7003                                                 | glycerol degradation to butanol                                                                             | pathways | 0.000196 | 2296.391         | 599.602         | 3.830           |
| K01706                                                   | gudD; glucarate dehydratase [EC:4.2.1.40]                                                                   | KO       | 0.001528 | 99.429           | 26.000          | 3.824           |
| K06971                                                   | K06971; uncharacterized protein                                                                             | KO       | 0.000549 | 485.643          | 127.389         | 3.812           |
| K04032                                                   | eutT; ethanolamine utilization cobalamin adenosyltransferase [EC:2.5.1.17]                                  | KO       | 0.002480 | 1043.714         | 278.556         | 3.747           |
| K07795                                                   | tctC; putative tricarboxylic transport membrane protein                                                     | KO       | 0.002470 | 67.286           | 18.000          | 3.738           |
| K13918                                                   | gudX; glucarate dehydratase-related protein                                                                 | KO       | 0.002468 | 66.714           | 18.000          | 3.706           |
| K04019                                                   | eutA; ethanolamine utilization protein EutA                                                                 | KO       | 0.001588 | 1987.571         | 541.778         | 3.669           |
| K02688                                                   | prpR; transcriptional regulator, propionate catabolism operon regulatory protein                            | KO       | 0.001048 | 85.143           | 23.333          | 3.649           |

|              |                                                                                               |          |          |           |           |       |
|--------------|-----------------------------------------------------------------------------------------------|----------|----------|-----------|-----------|-------|
| PWY0-41      | allantoin degradation IV (anaerobic)                                                          | pathways | 0.000485 | 187.615   | 51.798    | 3.622 |
| K03444       | MFS.SP; MFS transporter, SP family, sugar porter, other                                       | KO       | 0.002201 | 5480.000  | 1528.444  | 3.585 |
| K01183       | E3.2.1.14; chitinase [EC:3.2.1.14]                                                            | KO       | 0.002207 | 5552.257  | 1567.644  | 3.542 |
| K07334       | higB-1; toxin HigB-1                                                                          | KO       | 0.002207 | 5544.357  | 1612.500  | 3.438 |
| EC:2.3.1.20: | UDP-2-acetamido-3-amino-2,3-dideoxy-glucuronate N-acetyltransferase                           | EC       | 0.000004 | 680.637   | 198.256   | 3.433 |
| K13018       | wbpD, wibB; UDP-2-acetamido-3-amino-2,3-dideoxy-glucuronate N-acetyltransferase [EC:2.3.1.20] | KO       | 0.000004 | 680.637   | 198.256   | 3.433 |
| EC:4.2.1.42  | Galactarate dehydratase                                                                       | EC       | 0.001981 | 59.429    | 18.000    | 3.302 |
| K01708       | garD; galactarate dehydratase [EC:4.2.1.42]                                                   | KO       | 0.001981 | 59.429    | 18.000    | 3.302 |
| EC:4.1.2.53  | 2-keto-3-deoxy-L-rhamnonate aldolase                                                          | EC       | 0.001979 | 58.857    | 18.000    | 3.270 |
| K02854       | rhaR; AraC family transcriptional regulator, L-rhamnose operon transcriptional activator RhaR | KO       | 0.001979 | 58.857    | 18.000    | 3.270 |
| K12660       | rhmA; 2-dehydro-3-deoxy-L-rhamnonate aldolase [EC:4.1.2.53]                                   | KO       | 0.001979 | 58.857    | 18.000    | 3.270 |
| PWY-6629     | superpathway of L-tryptophan biosynthesis                                                     | pathways | 0.002291 | 588.030   | 181.666   | 3.237 |
| K01746       | E4.3.1.4; formiminotetrahydrofolate cyclodeaminase [EC:4.3.1.4]                               | KO       | 0.001538 | 967.714   | 301.444   | 3.210 |
| K10709       | frtC; fructoselysine 3-epimerase [EC:5.1.3.41]                                                | KO       | 0.001708 | 1412.571  | 441.500   | 3.199 |
| K07075       | K07075; uncharacterized protein                                                               | KO       | 0.001145 | 5540.343  | 1745.544  | 3.174 |
| K01608       | gcl; tartronate-semialdehyde synthase [EC:4.1.1.47]                                           | KO       | 0.000733 | 64.714    | 20.667    | 3.131 |
| K07221       | oprO_P; phosphate-selective porin OprO and OprP                                               | KO       | 0.000612 | 8111.664  | 2600.037  | 3.120 |
| K00483       | hpaB; 4-hydroxyphenylacetate 3-monoxygenase [EC:1.14.14.9]                                    | KO       | 0.000733 | 64.143    | 20.667    | 3.104 |
| GLUCARDEC    | D-glucarate degradation I                                                                     | pathways | 0.000855 | 150.875   | 48.853    | 3.088 |
| K09684       | pucR; purine catabolism regulatory protein                                                    | KO       | 0.002055 | 853.571   | 277.222   | 3.079 |
| K15527       | K15527; cysteate synthase [EC:2.5.1.76]                                                       | KO       | 0.000114 | 1045.451  | 340.222   | 3.073 |
| K07109       | K07109; uncharacterized protein                                                               | KO       | 0.000929 | 960.094   | 313.889   | 3.059 |
| K01646       | citD; citrate lyase subunit gamma (acyl carrier protein)                                      | KO       | 0.002111 | 1119.000  | 370.222   | 3.023 |
| EC:2.4.1.11  | Glycogen(starch) synthase                                                                     | EC       | 0.000124 | 1069.023  | 354.000   | 3.020 |
| K16153       | K16153; glycogen phosphorylase/synthase [EC:2.4.1.1 2.4.1.11]                                 | KO       | 0.000124 | 1069.023  | 354.000   | 3.020 |
| EC:2.1.1.34  | tRNA (guanosine(18)-2'-O)-methyltransferase                                                   | EC       | 0.001135 | 1122.594  | 376.333   | 2.983 |
| K00556       | trmH; tRNA (guanosine-2'-O)-methyltransferase [EC:2.1.1.34]                                   | KO       | 0.001135 | 1122.594  | 376.333   | 2.983 |
| EC:1.3.5.3   | Protoporphyrinogen IX dehydrogenase (menaquinone)                                             | EC       | 0.002399 | 1012.000  | 340.778   | 2.970 |
| K00230       | hemG; menaquinone-dependent protoporphyrinogen oxidase [EC:1.3.5.3]                           | KO       | 0.002399 | 1012.000  | 340.778   | 2.970 |
| EC:1.3.1.34  | 2,4-dienoyl-CoA reductase (NADPH)                                                             | EC       | 0.001390 | 1051.429  | 354.222   | 2.968 |
| K00219       | fadhI; 2,4-dienoyl-CoA reductase (NADPH2) [EC:1.3.1.34]                                       | KO       | 0.001390 | 1051.429  | 354.222   | 2.968 |
| GALACTARC    | D-galactarate degradation I                                                                   | pathways | 0.000879 | 102.454   | 34.799    | 2.944 |
| GLUCARGAI    | superpathway of D-glucarate and D-galactarate degradation                                     | pathways | 0.000879 | 102.454   | 34.799    | 2.944 |
| K01843       | kamA; lysine 2,3-aminomutase [EC:5.4.3.2]                                                     | KO       | 0.001160 | 8119.256  | 2761.987  | 2.940 |
| EC:2.4.2.52  | Triphosphoribosyl-dephospho-CoA synthase                                                      | EC       | 0.002313 | 1081.143  | 370.222   | 2.920 |
| EC:2.7.7.61  | Citrate lyase holo-[acyl-carrier protein] synthase                                            | EC       | 0.002341 | 1086.429  | 384.600   | 2.825 |
| K01966       | PCCB, pccB; propionyl-CoA carboxylase beta chain [EC:6.4.1.3 2.1.3.15]                        | KO       | 0.001069 | 8813.799  | 3149.770  | 2.798 |
| EC:6.4.1.3   | Propionyl-CoA carboxylase                                                                     | EC       | 0.002333 | 8815.941  | 3169.992  | 2.781 |
| K16849       | uxaA1; altronate dehydratase small subunit [EC:4.2.1.7]                                       | KO       | 0.001473 | 335.429   | 122.111   | 2.747 |
| K04026       | eutL; ethanolamine utilization protein EutL                                                   | KO       | 0.001687 | 1459.000  | 535.444   | 2.725 |
| ENTBACSYN    | enterobactin biosynthesis                                                                     | pathways | 0.002125 | 217.318   | 79.840    | 2.722 |
| PWY-7090     | UDP-2,3-diacetamido-2,3-dideoxy- $\alpha$ -D-mannuronate biosynthesis                         | pathways | 0.000443 | 184.031   | 67.612    | 2.722 |
| K09979       | K09979; uncharacterized protein                                                               | KO       | 0.000883 | 849.500   | 313.333   | 2.711 |
| K16850       | uxaA2; altronate dehydratase large subunit [EC:4.2.1.7]                                       | KO       | 0.001639 | 322.286   | 119.444   | 2.698 |
| K03298       | TC.DME; drug/metabolite transporter, DME family                                               | KO       | 0.000126 | 898.714   | 336.389   | 2.672 |
| K03446       | emrB; MFS transporter, DHA2 family, multidrug resistance protein                              | KO       | 0.001665 | 853.643   | 320.333   | 2.665 |
| K00662       | aacC; aminoglycoside 3-N-acetyltransferase [EC:2.3.1.81]                                      | KO       | 0.000536 | 471.643   | 177.333   | 2.660 |
| K14205       | mprF, fmtC; phosphatidylglycerol lysyltransferase [EC:2.3.2.3]                                | KO       | 0.001367 | 537.429   | 203.417   | 2.642 |
| K02454       | gspE; general secretion pathway protein E                                                     | KO       | 0.000004 | 1331.427  | 513.870   | 2.591 |
| K06726       | rbsD; D-ribose pyranase [EC:5.4.99.62]                                                        | KO       | 0.002072 | 1279.929  | 507.461   | 2.522 |
| K03741       | ARSC2, arsC; arsenate reductase [EC:1.20.4.1]                                                 | KO       | 0.000033 | 6425.714  | 2582.222  | 2.488 |
| K03303       | lctP; lactate permease                                                                        | KO       | 0.000511 | 6360.716  | 2569.778  | 2.475 |
| K02598       | nirC; nitrite transporter                                                                     | KO       | 0.000119 | 980.000   | 405.750   | 2.415 |
| K00680       | ytml; uncharacterized N-acetyltransferase [EC:2.3.1.-]                                        | KO       | 0.000713 | 3070.686  | 1298.256  | 2.365 |
| K13641       | iclR; IclR family transcriptional regulator, acetate operon repressor                         | KO       | 0.001591 | 58.857    | 25.000    | 2.354 |
| PWY-7456     | mannan degradation                                                                            | pathways | 0.000110 | 13612.667 | 5866.519  | 2.320 |
| EC:1.21.98.: | Cyclic dehydropantoinyl futasolase synthase                                                   | EC       | 0.001133 | 1399.643  | 614.167   | 2.279 |
| EC:2.5.1.12  | Aminodeoxyfutasolase synthase                                                                 | EC       | 0.001133 | 1399.643  | 614.167   | 2.279 |
| K11782       | mqnA; chorismate dehydratase [EC:4.2.1.151]                                                   | KO       | 0.001133 | 1399.643  | 614.167   | 2.279 |
| K11784       | mqnC; cyclic dehydropantoinyl futasolase synthase [EC:1.21.98.1]                              | KO       | 0.001133 | 1399.643  | 614.167   | 2.279 |
| K11785       | mqnD; 1,4-dihydroxy-6-naphthoate synthase [EC:1.14.-.-]                                       | KO       | 0.001133 | 1399.643  | 614.167   | 2.279 |
| K18285       | mqnE; aminodeoxyfutasolase synthase [EC:2.5.1.120]                                            | KO       | 0.001133 | 1399.643  | 614.167   | 2.279 |
| PWY-7371     | 1,4-dihydroxy-6-naphthoate biosynthesis II                                                    | pathways | 0.001133 | 1399.643  | 614.167   | 2.279 |
| PWY-7374     | 1,4-dihydroxy-6-naphthoate biosynthesis I                                                     | pathways | 0.001123 | 1395.256  | 613.944   | 2.273 |
| K11783       | mqnB; futasolase hydrolase [EC:3.2.2.26]                                                      | KO       | 0.001109 | 1388.929  | 613.611   | 2.264 |
| K09949       | K09949; uncharacterized protein                                                               | KO       | 0.000325 | 1070.472  | 478.426   | 2.237 |
| K02584       | nifA; Nif-specific regulatory protein                                                         | KO       | 0.000326 | 1070.047  | 491.648   | 2.176 |
| K16841       | hpxA; allantoin racemase [EC:5.1.99.3]                                                        | KO       | 0.001990 | 147.000   | 67.556    | 2.176 |
| EC:3.1.3.90  | Maltose 6'-phosphate phosphatase                                                              | EC       | 0.000007 | 226.571   | 104.333   | 2.172 |
| K06896       | mapP; maltose 6'-phosphate phosphatase [EC:3.1.3.90]                                          | KO       | 0.000007 | 226.571   | 104.333   | 2.172 |
| K05995       | pepE; dipeptidase E [EC:3.4.13.21]                                                            | KO       | 0.000948 | 1901.880  | 880.667   | 2.160 |
| K03760       | eptA, pmrC; lipid A ethanolaminephosphotransferase [EC:2.7.8.43]                              | KO       | 0.000590 | 963.571   | 454.444   | 2.120 |
| K01667       | tnaA; tryptophanase [EC:4.1.99.1]                                                             | KO       | 0.000435 | 2503.023  | 1191.111  | 2.101 |
| K03713       | glnR; MerR family transcriptional regulator, glutamine synthetase repressor                   | KO       | 0.002364 | 216.000   | 103.556   | 2.086 |
| PWY-6263     | superpathway of menaquinol-8 biosynthesis II                                                  | pathways | 0.000847 | 3523.433  | 1696.657  | 2.077 |
| K04030       | eutQ; ethanolamine utilization protein EutQ                                                   | KO       | 0.001083 | 1418.143  | 683.000   | 2.076 |
| K09778       | K09778; uncharacterized protein                                                               | KO       | 0.000304 | 1122.119  | 545.370   | 2.058 |
| K09994       | phnO; aminoalkylphosphonate N-acetyltransferase [EC:2.3.1.-]                                  | KO       | 0.002298 | 89.714    | 43.667    | 2.055 |
| K16926       | htsT; energy-coupling factor transport system substrate-specific component                    | KO       | 0.000541 | 2432.429  | 1226.167  | 1.984 |
| K17213       | K17213; inositol transport system substrate-binding protein                                   | KO       | 0.001801 | 1089.857  | 562.556   | 1.937 |
| K10974       | codB; cytosine permease                                                                       | KO       | 0.001508 | 767.071   | 398.572   | 1.925 |
| K00924       | E2.7.1.-; kinase [EC:2.7.1.-]                                                                 | KO       | 0.001491 | 190.429   | 99.556    | 1.913 |
| K08177       | oxIT; MFS transporter, OFA family, oxalate/formate antiporter                                 | KO       | 0.001674 | 4433.786  | 2334.417  | 1.899 |
| K13041       | ttrR; two-component system, LuxR family, response regulator TtrR                              | KO       | 0.002068 | 1219.000  | 646.556   | 1.885 |
| K01305       | iadA; beta-aspartyl-dipeptidase (metallo-type) [EC:3.4.19.-]                                  | KO       | 0.000533 | 1272.071  | 687.822   | 1.849 |
| K03299       | TC.GNTP; gluconate:H+ symporter, GntP family                                                  | KO       | 0.001732 | 8862.616  | 4834.006  | 1.833 |
| K04023       | eutH; ethanolamine transporter                                                                | KO       | 0.001022 | 2590.786  | 1436.667  | 1.803 |
| EC:2.7.7.43  | N-acylneuraminate cytidyllyltransferase                                                       | EC       | 0.001733 | 9133.351  | 5129.200  | 1.781 |
| K00983       | neuA; N-acylneuraminate cytidyllyltransferase [EC:2.7.7.43]                                   | KO       | 0.001733 | 9133.351  | 5129.200  | 1.781 |
| EC:2.4.1.18: | mannosaminyltransferase                                                                       | EC       | 0.001285 | 17687.477 | 10158.914 | 1.741 |

|             |                                                                                                              |          |          |           |           |       |
|-------------|--------------------------------------------------------------------------------------------------------------|----------|----------|-----------|-----------|-------|
| K05946      | tagA, tarA; N-acetylglucosaminylidiphosphoundecaprenol N-acetyl-beta-D-mannosaminyltransferase [EC:2.4.1.10] | KO       | 0.001285 | 17687.477 | 10158.914 | 1.741 |
| EC:2.7.8.20 | Phosphatidylglycerol--membrane-oligosaccharide glycerophosphotransferase                                     | EC       | 0.002502 | 2697.857  | 1570.750  | 1.718 |
| K14260      | alaA; alanine-synthesizing transaminase [EC:2.6.1.66 2.6.1.2]                                                | KO       | 0.001848 | 999.929   | 583.500   | 1.714 |
| K04029      | eutP; ethanolamine utilization protein EutP                                                                  | KO       | 0.000961 | 2679.286  | 1569.500  | 1.707 |
| K09707      | K09707; uncharacterized protein                                                                              | KO       | 0.001743 | 2469.000  | 1448.056  | 1.705 |
| K00042      | garR, glxR; 2-hydroxy-3-oxopropionate reductase [EC:1.1.1.60]                                                | KO       | 0.000597 | 3761.001  | 2210.611  | 1.701 |
| K02453      | gspD; general secretion pathway protein D                                                                    | KO       | 0.000536 | 2587.094  | 1528.018  | 1.693 |
| K02477      | K02477; two-component system, LytTR family, response regulator                                               | KO       | 0.001216 | 16925.430 | 10089.694 | 1.677 |
| K10254      | ohyA, sph; oleate hydratase [EC:4.2.1.53]                                                                    | KO       | 0.001960 | 2972.286  | 1775.517  | 1.674 |
| K10824      | nikE; nickel transport system ATP-binding protein [EC:3.6.3.24]                                              | KO       | 0.001976 | 443.429   | 267.333   | 1.659 |
| K02009      | cbiN; cobalt/nickel transport protein                                                                        | KO       | 0.002498 | 2289.214  | 1394.472  | 1.642 |
| K01295      | cpg; glutamate carboxypeptidase [EC:3.4.17.11]                                                               | KO       | 0.000066 | 1344.857  | 833.000   | 1.614 |
| K12507      | fadK; acyl-CoA synthetase [EC:6.2.1.-]                                                                       | KO       | 0.000744 | 121.571   | 75.833    | 1.603 |
| EC:1.2.1.21 | Glycolaldehyde dehydrogenase                                                                                 | EC       | 0.001117 | 142.543   | 89.144    | 1.599 |
| EC:1.2.1.22 | Lactaldehyde dehydrogenase                                                                                   | EC       | 0.001117 | 142.543   | 89.144    | 1.599 |
| K02626      | pdaD; arginine decarboxylase [EC:4.1.1.19]                                                                   | KO       | 0.001117 | 142.543   | 89.144    | 1.599 |
| K07248      | aldA; lactaldehyde dehydrogenase / glycolaldehyde dehydrogenase [EC:1.2.1.22 1.2.1.21]                       | KO       | 0.001117 | 142.543   | 89.144    | 1.599 |
| K00968      | PCYT1; choline-phosphate cytidyltransferase [EC:2.7.7.15]                                                    | KO       | 0.001154 | 142.543   | 89.144    | 1.599 |
| K01247      | alkA; DNA-3-methyladenine glycosylase II [EC:3.2.2.21]                                                       | KO       | 0.000344 | 540.143   | 344.667   | 1.567 |
| K18331      | hndC; NADP-reducing hydrogenase subunit HndC [EC:1.12.1.3]                                                   | KO       | 0.000121 | 5046.994  | 3220.867  | 1.567 |
| K01760      | metC; cystathionine beta-lyase [EC:4.4.1.8]                                                                  | KO       | 0.001958 | 1016.857  | 658.667   | 1.544 |
| K03326      | TC.DCUC, dcuC, dcuD; C4-dicarboxylate transporter, DcuC family                                               | KO       | 0.001173 | 4893.857  | 3173.444  | 1.542 |
| EC:4.3.1.18 | D-serine ammonia-lyase                                                                                       | EC       | 0.002041 | 561.000   | 368.222   | 1.524 |
| K01753      | dsdA; D-serine dehydratase [EC:4.3.1.18]                                                                     | KO       | 0.002041 | 561.000   | 368.222   | 1.524 |
| K09928      | K09928; uncharacterized protein                                                                              | KO       | 0.000596 | 2099.333  | 1386.537  | 1.514 |
| EC:1.1.3.15 | (S)-2-hydroxy-acid oxidase                                                                                   | EC       | 0.000160 | 2181.834  | 1441.842  | 1.513 |
| K00104      | glcD; glycolate oxidase [EC:1.1.3.15]                                                                        | KO       | 0.000160 | 2181.834  | 1441.842  | 1.513 |
| K07315      | rsbU_P; phosphoserine phosphatase RsbU/P [EC:3.1.3.3]                                                        | KO       | 0.000368 | 2205.850  | 1499.792  | 1.471 |
| GLYCOL-GU   | superpathway of glycol metabolism and degradation                                                            | pathways | 0.000291 | 235.238   | 160.769   | 1.463 |
| PWY-5705    | allantoin degradation to glyoxylate III                                                                      | pathways | 0.000804 | 325.928   | 224.224   | 1.454 |
| K00563      | rImA1; 23S rRNA (guanine745-N1)-methyltransferase [EC:2.1.1.187]                                             | KO       | 0.002503 | 3306.714  | 2287.583  | 1.446 |
| K02666      | piIQ; type IV pilus assembly protein PiIQ                                                                    | KO       | 0.001040 | 1891.666  | 1317.944  | 1.435 |
| K01589      | purK; 5-(carboxyamino)imidazole ribonucleotide synthase [EC:6.3.4.18]                                        | KO       | 0.002045 | 3238.714  | 2256.778  | 1.435 |
| EC:2.8.1.1  | Thiosulfate sulfurtransferase                                                                                | EC       | 0.002077 | 583.714   | 407.389   | 1.433 |
| K02200      | ccmH; cytochrome c-type biogenesis protein CcmH                                                              | KO       | 0.002291 | 914.429   | 639.556   | 1.430 |
| K18332      | hndD; NADP-reducing hydrogenase subunit HndD [EC:1.12.1.3]                                                   | KO       | 0.000892 | 4467.780  | 3128.144  | 1.428 |
| EC:1.7.2.3  | Trimethylamine-N-oxide reductase (cytochrome c)                                                              | EC       | 0.002305 | 913.286   | 639.556   | 1.428 |
| EC:1.12.1.3 | Hydrogen dehydrogenase (NADP+)                                                                               | EC       | 0.001083 | 16404.906 | 11515.189 | 1.425 |
| K01480      | speB; agmatinase [EC:3.5.3.11]                                                                               | KO       | 0.001278 | 4997.809  | 3510.250  | 1.424 |
| K02526      | kdgT; 2-keto-3-deoxygluconate permease                                                                       | KO       | 0.001000 | 147.714   | 105.778   | 1.396 |
| K02794      | PTS-Man-EIIB, manX; PTS system, mannose-specific IIB component [EC:2.7.1.191]                                | KO       | 0.001442 | 4628.500  | 3348.906  | 1.382 |
| K15725      | czcC; outer membrane protein, cobalt-zinc-cadmium efflux system                                              | KO       | 0.000460 | 2116.800  | 1534.011  | 1.380 |
| K01011      | TST, MPST, sseA; thiosulfate/3-mercaptopropionate sulfurtransferase [EC:2.8.1.1 2.8.1.2]                     | KO       | 0.000290 | 529.571   | 385.056   | 1.375 |
| K02440      | GLPF; glycerol uptake facilitator protein                                                                    | KO       | 0.000416 | 1119.494  | 819.839   | 1.366 |
| K00332      | nuoC; NADH-quinone oxidoreductase subunit C [EC:1.6.5.3]                                                     | KO       | 0.000039 | 1398.333  | 1025.537  | 1.364 |
| K01466      | allB; allantoinase [EC:3.5.2.5]                                                                              | KO       | 0.001250 | 344.929   | 255.667   | 1.349 |
| K04024      | eutI; ethanolamine utilization protein EutI                                                                  | KO       | 0.001362 | 978.429   | 727.778   | 1.344 |
| ARGORNPR    | arginine, ornithine and proline interconversion                                                              | pathways | 0.000600 | 1757.222  | 1323.235  | 1.328 |
| K02445      | glpT; MFS transporter, OPA family, glycerol-3-phosphate transporter                                          | KO       | 0.001495 | 7261.309  | 5490.611  | 1.322 |
| K016379     | E4.1.3.3, nanA, NPL; N-acetylneuraminase lyase [EC:4.1.3.3]                                                  | KO       | 0.001319 | 19287.839 | 14726.142 | 1.310 |
| EC:3.5.3.9  | Allantoate deiminase                                                                                         | EC       | 0.000996 | 422.500   | 324.111   | 1.304 |
| K02083      | allC; allantoate deiminase [EC:3.5.3.9]                                                                      | KO       | 0.000996 | 422.500   | 324.111   | 1.304 |
| K02483      | K02483; two-component system, OmpR family, response regulator                                                | KO       | 0.002121 | 2465.714  | 1893.111  | 1.302 |
| K02031      | ABC.PE.A; peptide/nickel transport system ATP-binding protein                                                | KO       | 0.000709 | 18858.049 | 14496.192 | 1.301 |
| K03556      | malT; LuxR family transcriptional regulator, maltose regulon positive regulatory protein                     | KO       | 0.002502 | 109.786   | 84.944    | 1.292 |
| K00184      | K00184; prokaryotic molybdopterin-containing oxidoreductase family, iron-sulfur binding subunit              | KO       | 0.001601 | 2073.690  | 1616.814  | 1.283 |
| K00333      | nuoD; NADH-quinone oxidoreductase subunit D [EC:1.6.5.3]                                                     | KO       | 0.000033 | 1416.476  | 1106.648  | 1.280 |
| K01154      | hdsS; type I restriction enzyme, S subunit [EC:3.1.21.3]                                                     | KO       | 0.001198 | 64701.709 | 50912.000 | 1.271 |
| K00185      | K00185; prokaryotic molybdopterin-containing oxidoreductase family, membrane subunit                         | KO       | 0.000004 | 1538.619  | 1212.092  | 1.269 |
| K02474      | wbpO; UDP-N-acetyl-D-galactosamine dehydrogenase [EC:1.1.1.1-]                                               | KO       | 0.000787 | 7242.989  | 5716.233  | 1.267 |
| K03581      | recD; exodeoxyribonuclease V alpha subunit [EC:3.1.11.5]                                                     | KO       | 0.001297 | 17022.931 | 13568.656 | 1.255 |
| K10823      | oppF; oligopeptide transport system ATP-binding protein                                                      | KO       | 0.001164 | 18539.737 | 14884.201 | 1.246 |
| K08223      | fsr; MFS transporter, FSR family, fosmidomycin resistance protein                                            | KO       | 0.000073 | 7217.757  | 5824.533  | 1.239 |
| K00294      | E1.2.1.88; 1-pyrroline-5-carboxylate dehydrogenase [EC:1.2.1.88]                                             | KO       | 0.000913 | 1278.494  | 1034.311  | 1.236 |
| K03319      | TC.DASS; divalent anion:Na+ symporter, DASS family                                                           | KO       | 0.001313 | 913.286   | 743.000   | 1.229 |
| K13954      | yaI; alcohol dehydrogenase [EC:1.1.1.1]                                                                      | KO       | 0.000617 | 788.643   | 647.472   | 1.218 |
| K01464      | DPYS, dht, hydA; dihydropyrimidinase [EC:3.5.2.2]                                                            | KO       | 0.001820 | 6338.929  | 5214.639  | 1.216 |
| K03772      | fkpA; FKBP-type peptidyl-prolyl cis-trans isomerase FkpA [EC:5.2.1.8]                                        | KO       | 0.000348 | 7266.161  | 5992.570  | 1.213 |
| K15583      | oppD; oligopeptide transport system ATP-binding protein                                                      | KO       | 0.000396 | 14895.261 | 12371.703 | 1.204 |
| K02759      | PTS-Cel-EIIA, celC, chbA; PTS system, cellobiose-specific IIA component [EC:2.7.1.196 2.7.1.205]             | KO       | 0.000207 | 1540.286  | 1283.906  | 1.200 |
| EC:5.1.3.14 | UDP-N-acetylglucosamine 2-epimerase (non-hydrolyzing)                                                        | EC       | 0.002392 | 29604.099 | 24805.039 | 1.193 |
| K01791      | wecB; UDP-N-acetylglucosamine 2-epimerase (non-hydrolyzing) [EC:5.1.3.14]                                    | KO       | 0.002392 | 29604.099 | 24805.039 | 1.193 |
| K11741      | sugE; quaternary ammonium compound-resistance protein SugE                                                   | KO       | 0.002461 | 8330.947  | 7060.737  | 1.180 |
| K07150      | K07150; uncharacterized protein                                                                              | KO       | 0.000646 | 8602.714  | 7329.139  | 1.174 |
| K14652      | ribBA; 3,4-dihydroxy 2-butanone 4-phosphate synthase / GTP cyclohydrolase II [EC:4.1.99.12 3.5.4.25]         | KO       | 0.000894 | 26900.271 | 22932.831 | 1.173 |
| K01439      | dapE; succinyl-diaminopimelate desuccinylase [EC:3.5.1.18]                                                   | KO       | 0.001176 | 14139.857 | 12085.778 | 1.170 |
| EC:1.1.5.3  | Glycerol-3-phosphate dehydrogenase                                                                           | EC       | 0.000157 | 17327.636 | 15543.506 | 1.115 |
| EC:3.2.1.86 | 6-phospho-beta-glucosidase                                                                                   | EC       | 0.000224 | 18308.144 | 16605.522 | 1.103 |
| K00318      | PRODH; proline dehydrogenase [EC:1.5.-.-]                                                                    | KO       | 0.000793 | 1008.543  | 916.867   | 1.100 |
| K02035      | ABC.PE.S; peptide/nickel transport system substrate-binding protein                                          | KO       | 0.002087 | 31683.574 | 28921.261 | 1.096 |
| K00111      | glpA, glpD; glycerol-3-phosphate dehydrogenase [EC:1.1.5.3]                                                  | KO       | 0.000028 | 16721.447 | 15372.839 | 1.088 |
| P161-PWY    | acetylene degradation                                                                                        | pathways | 0.001368 | 11740.449 | 10842.758 | 1.083 |
| K09792      | K09792; uncharacterized protein                                                                              | KO       | 0.000495 | 1880.429  | 1747.722  | 1.076 |
| K00852      | rbsK, RBKS; ribokinase [EC:2.7.1.15]                                                                         | KO       | 0.001228 | 14842.614 | 13846.161 | 1.072 |
| EC:1.16.3.1 | Ferroxidase                                                                                                  | EC       | 0.000191 | 9140.280  | 8534.478  | 1.071 |
| K03594      | bfr; bacterioferritin [EC:1.16.3.1]                                                                          | KO       | 0.000191 | 9140.280  | 8534.478  | 1.071 |
| EC:1.2.1.10 | Acetaldehyde dehydrogenase (acetylating)                                                                     | EC       | 0.001271 | 7466.286  | 7069.628  | 1.056 |
| HOMOSER-I   | L-methionine biosynthesis I                                                                                  | pathways | 0.001751 | 1377.439  | 1304.585  | 1.056 |
| K07404      | pgl; 6-phosphogluconolactonase [EC:3.1.1.31]                                                                 | KO       | 0.002196 | 10515.073 | 10003.944 | 1.051 |
| K04072      | adhE; acetaldehyde dehydrogenase / alcohol dehydrogenase [EC:1.2.1.10 1.1.1.1]                               | KO       | 0.001993 | 6119.714  | 5836.961  | 1.048 |

|                                                          |                                                                                                  |          |          |           |           |        |
|----------------------------------------------------------|--------------------------------------------------------------------------------------------------|----------|----------|-----------|-----------|--------|
| MET-SAM-P                                                | superpathway of S-adenosyl-L-methionine biosynthesis                                             | pathways | 0.001583 | 2072.658  | 1985.722  | 1.044  |
| K08234                                                   | yaer; glyoxylase I family protein                                                                | KO       | 0.000682 | 949.300   | 913.428   | 1.039  |
| K01478                                                   | arcA; arginine deiminase [EC:3.5.3.6]                                                            | KO       | 0.002518 | 1221.594  | 1182.667  | 1.033  |
| PWY-5347                                                 | superpathway of L-methionine biosynthesis (transsulfuration)                                     | pathways | 0.001521 | 2973.714  | 2886.478  | 1.030  |
| K07152                                                   | SCO1_2; protein SCO1/2                                                                           | KO       | 0.000354 | 1885.429  | 1831.278  | 1.030  |
| K01271                                                   | pepQ; Xaa-Pro dipeptidase [EC:3.4.13.9]                                                          | KO       | 0.000041 | 1691.071  | 1663.194  | 1.017  |
| <b>Decreased abundance in recipients from Mg2800 FMT</b> |                                                                                                  |          |          |           |           |        |
| K00507                                                   | SCD, desC; stearoyl-CoA desaturase (Delta-9 desaturase) [EC:1.14.19.1]                           | KO       | 0.001063 | 13.714    | 81.667    | -5.955 |
| EC:1.14.19.1                                             | Stearoyl-[acyl-carrier-protein] 9-desaturase                                                     | EC       | 0.000999 | 13.714    | 81.111    | -5.914 |
| K01555                                                   | FAH, fahA; fumarylacetoacetase [EC:3.7.1.2]                                                      | KO       | 0.000999 | 13.714    | 81.111    | -5.914 |
| K03921                                                   | FAB2, SSI2, desA1; acyl-[acyl-carrier-protein] desaturase [EC:1.14.19.2 1.14.19.11 1.14.19.26]   | KO       | 0.000999 | 13.714    | 81.111    | -5.914 |
| K09992                                                   | K09992; uncharacterized protein                                                                  | KO       | 0.000999 | 13.714    | 81.111    | -5.914 |
| K06443                                                   | lycB, crtL1, crtY; lycopene beta-cyclase [EC:5.5.1.19]                                           | KO       | 0.001017 | 13.714    | 81.111    | -5.914 |
| EC:1.2.1.4                                               | Aldehyde dehydrogenase (NADP(+))                                                                 | EC       | 0.001091 | 14.286    | 81.111    | -5.678 |
| K03405                                                   | chlI, bchI; magnesium chelatase subunit I [EC:6.6.1.1]                                           | KO       | 0.001091 | 14.286    | 81.111    | -5.678 |
| K14519                                                   | aldH; NADP-dependent aldehyde dehydrogenase [EC:1.2.1.4]                                         | KO       | 0.001091 | 14.286    | 81.111    | -5.678 |
| EC:6.6.1.1                                               | Magnesium chelatase                                                                              | EC       | 0.001131 | 14.286    | 81.111    | -5.678 |
| K08976                                                   | K08976; putative membrane protein                                                                | KO       | 0.002175 | 15.714    | 83.556    | -5.317 |
| K16961                                                   | yxex; putative amino-acid transport system substrate-binding protein                             | KO       | 0.000503 | 68.571    | 188.000   | -2.742 |
| K16962                                                   | yxexN; putative amino-acid transport system permease protein                                     | KO       | 0.000503 | 68.571    | 188.000   | -2.742 |
| K01630                                                   | garI; 2-dehydro-3-deoxyglucarate aldolase [EC:4.1.2.20]                                          | KO       | 0.002060 | 408.571   | 776.889   | -1.901 |
| K02347                                                   | polX, dpx; DNA polymerase (family X)                                                             | KO       | 0.001017 | 81.286    | 141.222   | -1.737 |
| TYRFUMCA                                                 | L-tyrosine degradation I                                                                         | pathways | 0.000802 | 205.673   | 334.248   | -1.625 |
| K08097                                                   | comA; phosphosulfolactate synthase [EC:4.4.1.19]                                                 | KO       | 0.002343 | 83.286    | 132.667   | -1.593 |
| K02839                                                   | prfH; peptide chain release factor                                                               | KO       | 0.001445 | 111.714   | 172.556   | -1.545 |
| K02761                                                   | PTS-Cel-EIIC, celB, chbC; PTS system, cellobiose-specific IIC component                          | KO       | 0.001415 | 2280.714  | 3276.728  | -1.437 |
| K09680                                                   | coaW; type II pantothenate kinase [EC:2.7.1.33]                                                  | KO       | 0.000908 | 7363.629  | 9041.144  | -1.228 |
| EC:4.1.2.52                                              | 4-hydroxy-2-oxoheptanedioate aldolase                                                            | EC       | 0.002084 | 841.857   | 1023.444  | -1.216 |
| K02510                                                   | hpaI, hpcH; 4-hydroxy-2-oxoheptanedioate aldolase [EC:4.1.2.52]                                  | KO       | 0.002084 | 841.857   | 1023.444  | -1.216 |
| K01684                                                   | dgoD; galactonate dehydratase [EC:4.2.1.6]                                                       | KO       | 0.002476 | 141.429   | 170.889   | -1.208 |
| PWY-5920                                                 | superpathway of heme biosynthesis from glycine                                                   | pathways | 0.000213 | 2303.938  | 2707.644  | -1.175 |
| K02276                                                   | coxC, ctaE; cytochrome c oxidase subunit III [EC:1.9.3.1]                                        | KO       | 0.000178 | 1290.714  | 1508.111  | -1.168 |
| P4-PWY                                                   | superpathway of L-lysine, L-threonine and L-methionine biosynthesis I                            | pathways | 0.001783 | 4131.509  | 4676.903  | -1.132 |
| K02274                                                   | coxA, ctaD; cytochrome c oxidase subunit I [EC:1.9.3.1]                                          | KO       | 0.000316 | 1279.000  | 1429.444  | -1.118 |
| K02275                                                   | coxB, ctaC; cytochrome c oxidase subunit II [EC:1.9.3.1]                                         | KO       | 0.000317 | 1279.571  | 1429.444  | -1.117 |
| K01724                                                   | PCBD, phhB; 4a-hydroxytetrahydrobiopterin dehydratase [EC:4.2.1.96]                              | KO       | 0.000312 | 1276.714  | 1425.667  | -1.117 |
| K10764                                                   | metZ; O-succinylhomoserine sulphydrylase [EC:2.5.1.-]                                            | KO       | 0.000310 | 1276.714  | 1425.111  | -1.116 |
| K08973                                                   | K08973; putative membrane protein                                                                | KO       | 0.000323 | 1287.429  | 1425.111  | -1.107 |
| K00406                                                   | ccoP; cytochrome c oxidase cbb3-type subunit III                                                 | KO       | 0.000322 | 1288.000  | 1425.111  | -1.106 |
| K03325                                                   | ACR3, arsB; arsenite transporter                                                                 | KO       | 0.001860 | 990.714   | 1094.278  | -1.105 |
| PWY-3781                                                 | aerobic respiration I (cytochrome c)                                                             | pathways | 0.000092 | 10241.562 | 11248.524 | -1.098 |
| EC:4.1.2.40                                              | Tagatose-bisphosphate aldolase                                                                   | EC       | 0.001796 | 1322.429  | 1438.917  | -1.088 |
| ARG+POLYA                                                | superpathway of arginine and polyamine biosynthesis                                              | pathways | 0.002147 | 2165.215  | 2257.813  | -1.043 |
| K02779                                                   | PTS-Glc-EIIC, ptsG; PTS system, glucose-specific IIC component                                   | KO       | 0.000125 | 517.714   | 539.111   | -1.041 |
| K19055                                                   | prdX, proX; Ala-tRNA(Pro) deacylase [EC:3.1.1.-]                                                 | KO       | 0.001012 | 7346.451  | 7623.028  | -1.038 |
| K08998                                                   | K08998; uncharacterized protein                                                                  | KO       | 0.002414 | 21691.627 | 22397.764 | -1.033 |
| K03786                                                   | aroQ, qutE; 3-dehydroquinate dehydratase II [EC:4.2.1.10]                                        | KO       | 0.002581 | 22422.080 | 22856.867 | -1.019 |
| K01817                                                   | trpF; phosphoribosylanthranilate isomerase [EC:5.3.1.24]                                         | KO       | 0.000874 | 24430.943 | 24864.659 | -1.018 |
| K02760                                                   | PTS-Cel-EIIB, celA, chbB; PTS system, cellobiose-specific IIB component [EC:2.7.1.196 2.7.1.205] | KO       | 0.000331 | 1756.571  | 1781.350  | -1.014 |

\* day 12 post FMT; ordered according to fold-difference; p-values based on ANOVA; grey highlights pathways and processes mentioned in the manuscript.
