# Supplementary figures and images for: Magnesium increases numbers of Foxp3+ Treg cells and reduces arthritis severity and joint damage in an IL-10-dependent manner mediated by the intestinal microbiome
Source: PubMed Central journal article supplement — eBioMedicine. 2023 May 16;92:104603. doi: 10.1016/j.ebiom.2023.104603 (PMC10203746; doi:10.1016/j.ebiom.2023.104603), 2023-05-16

**A****Weight**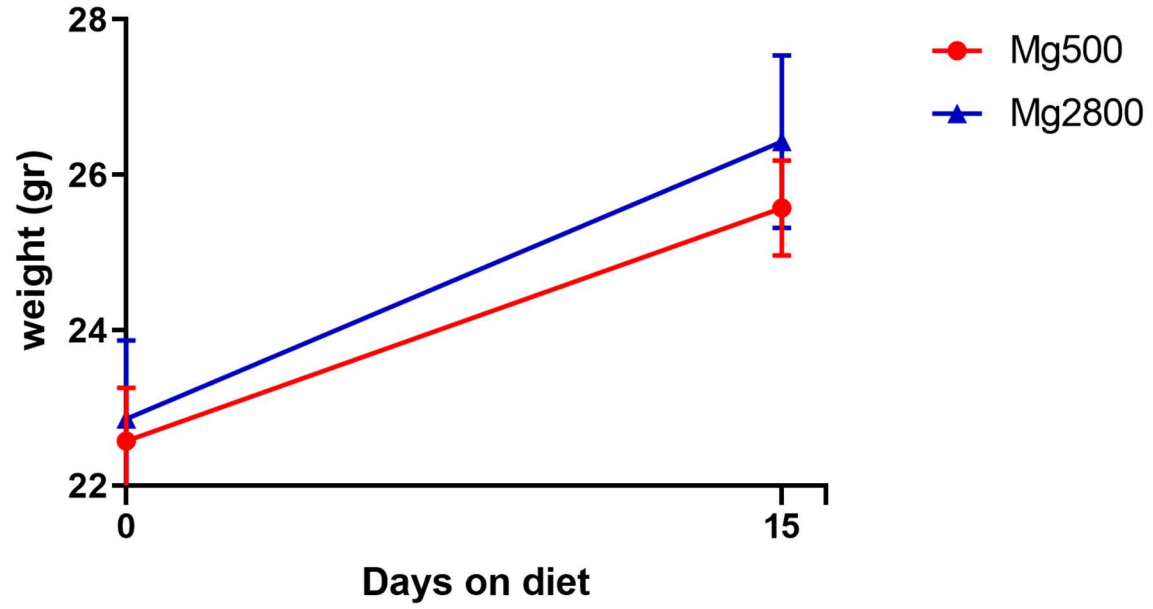**B****Mg serum levels**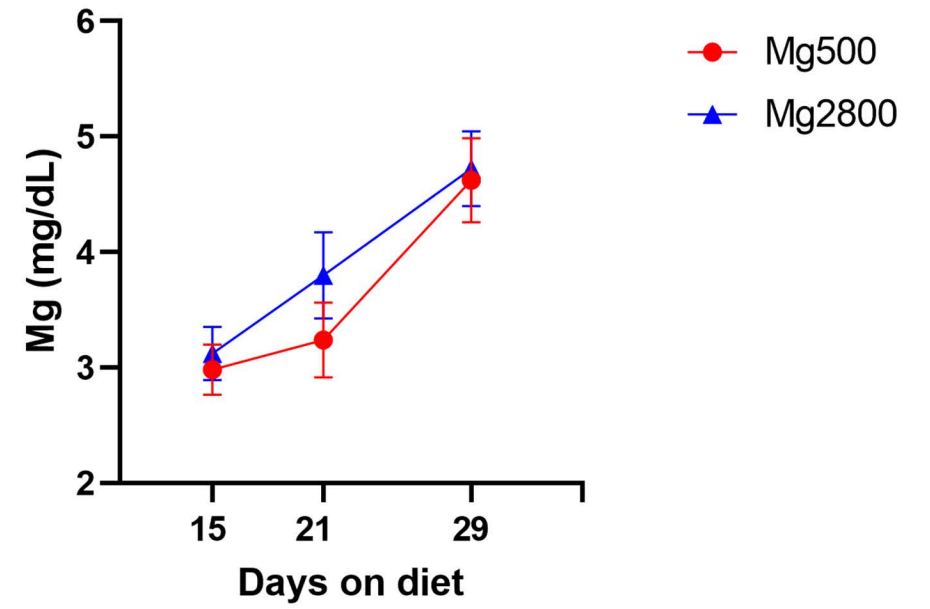

Supplement: mmc4.pdf [file mmc4.pdf]

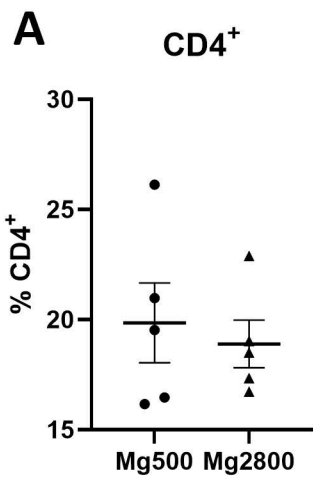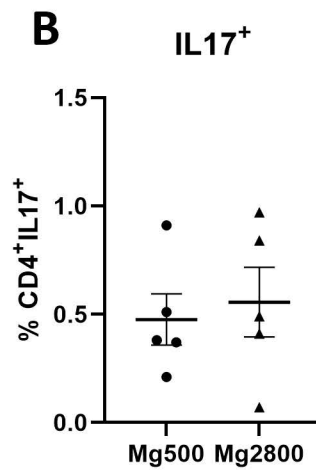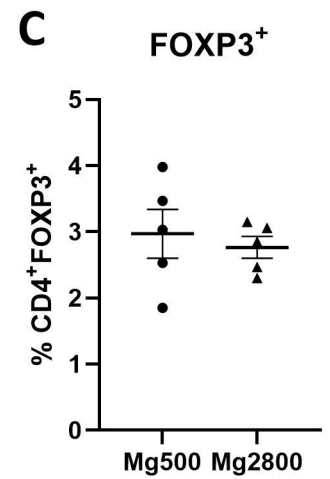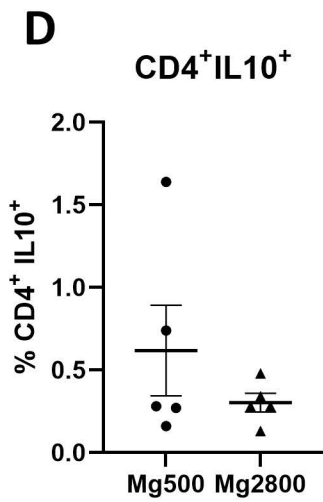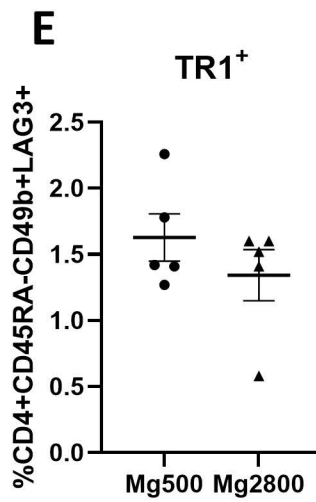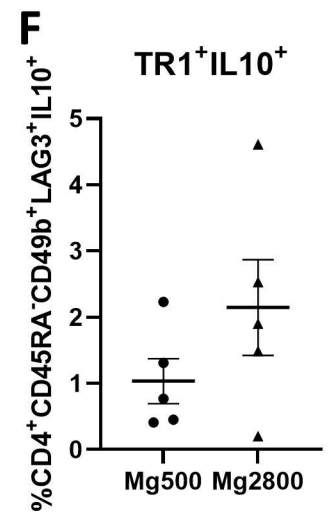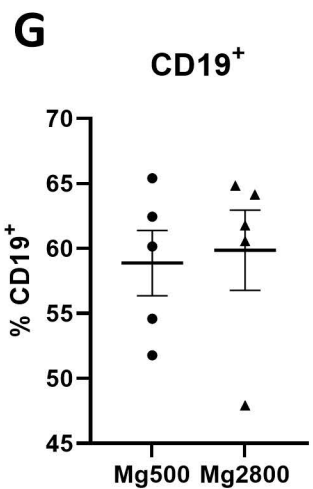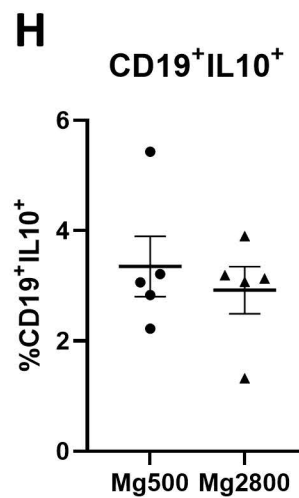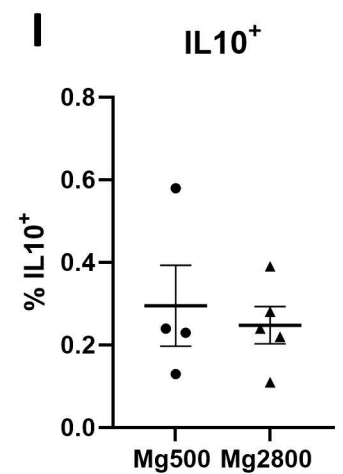

Supplement: mmc5.pdf [file mmc5.pdf]

**A**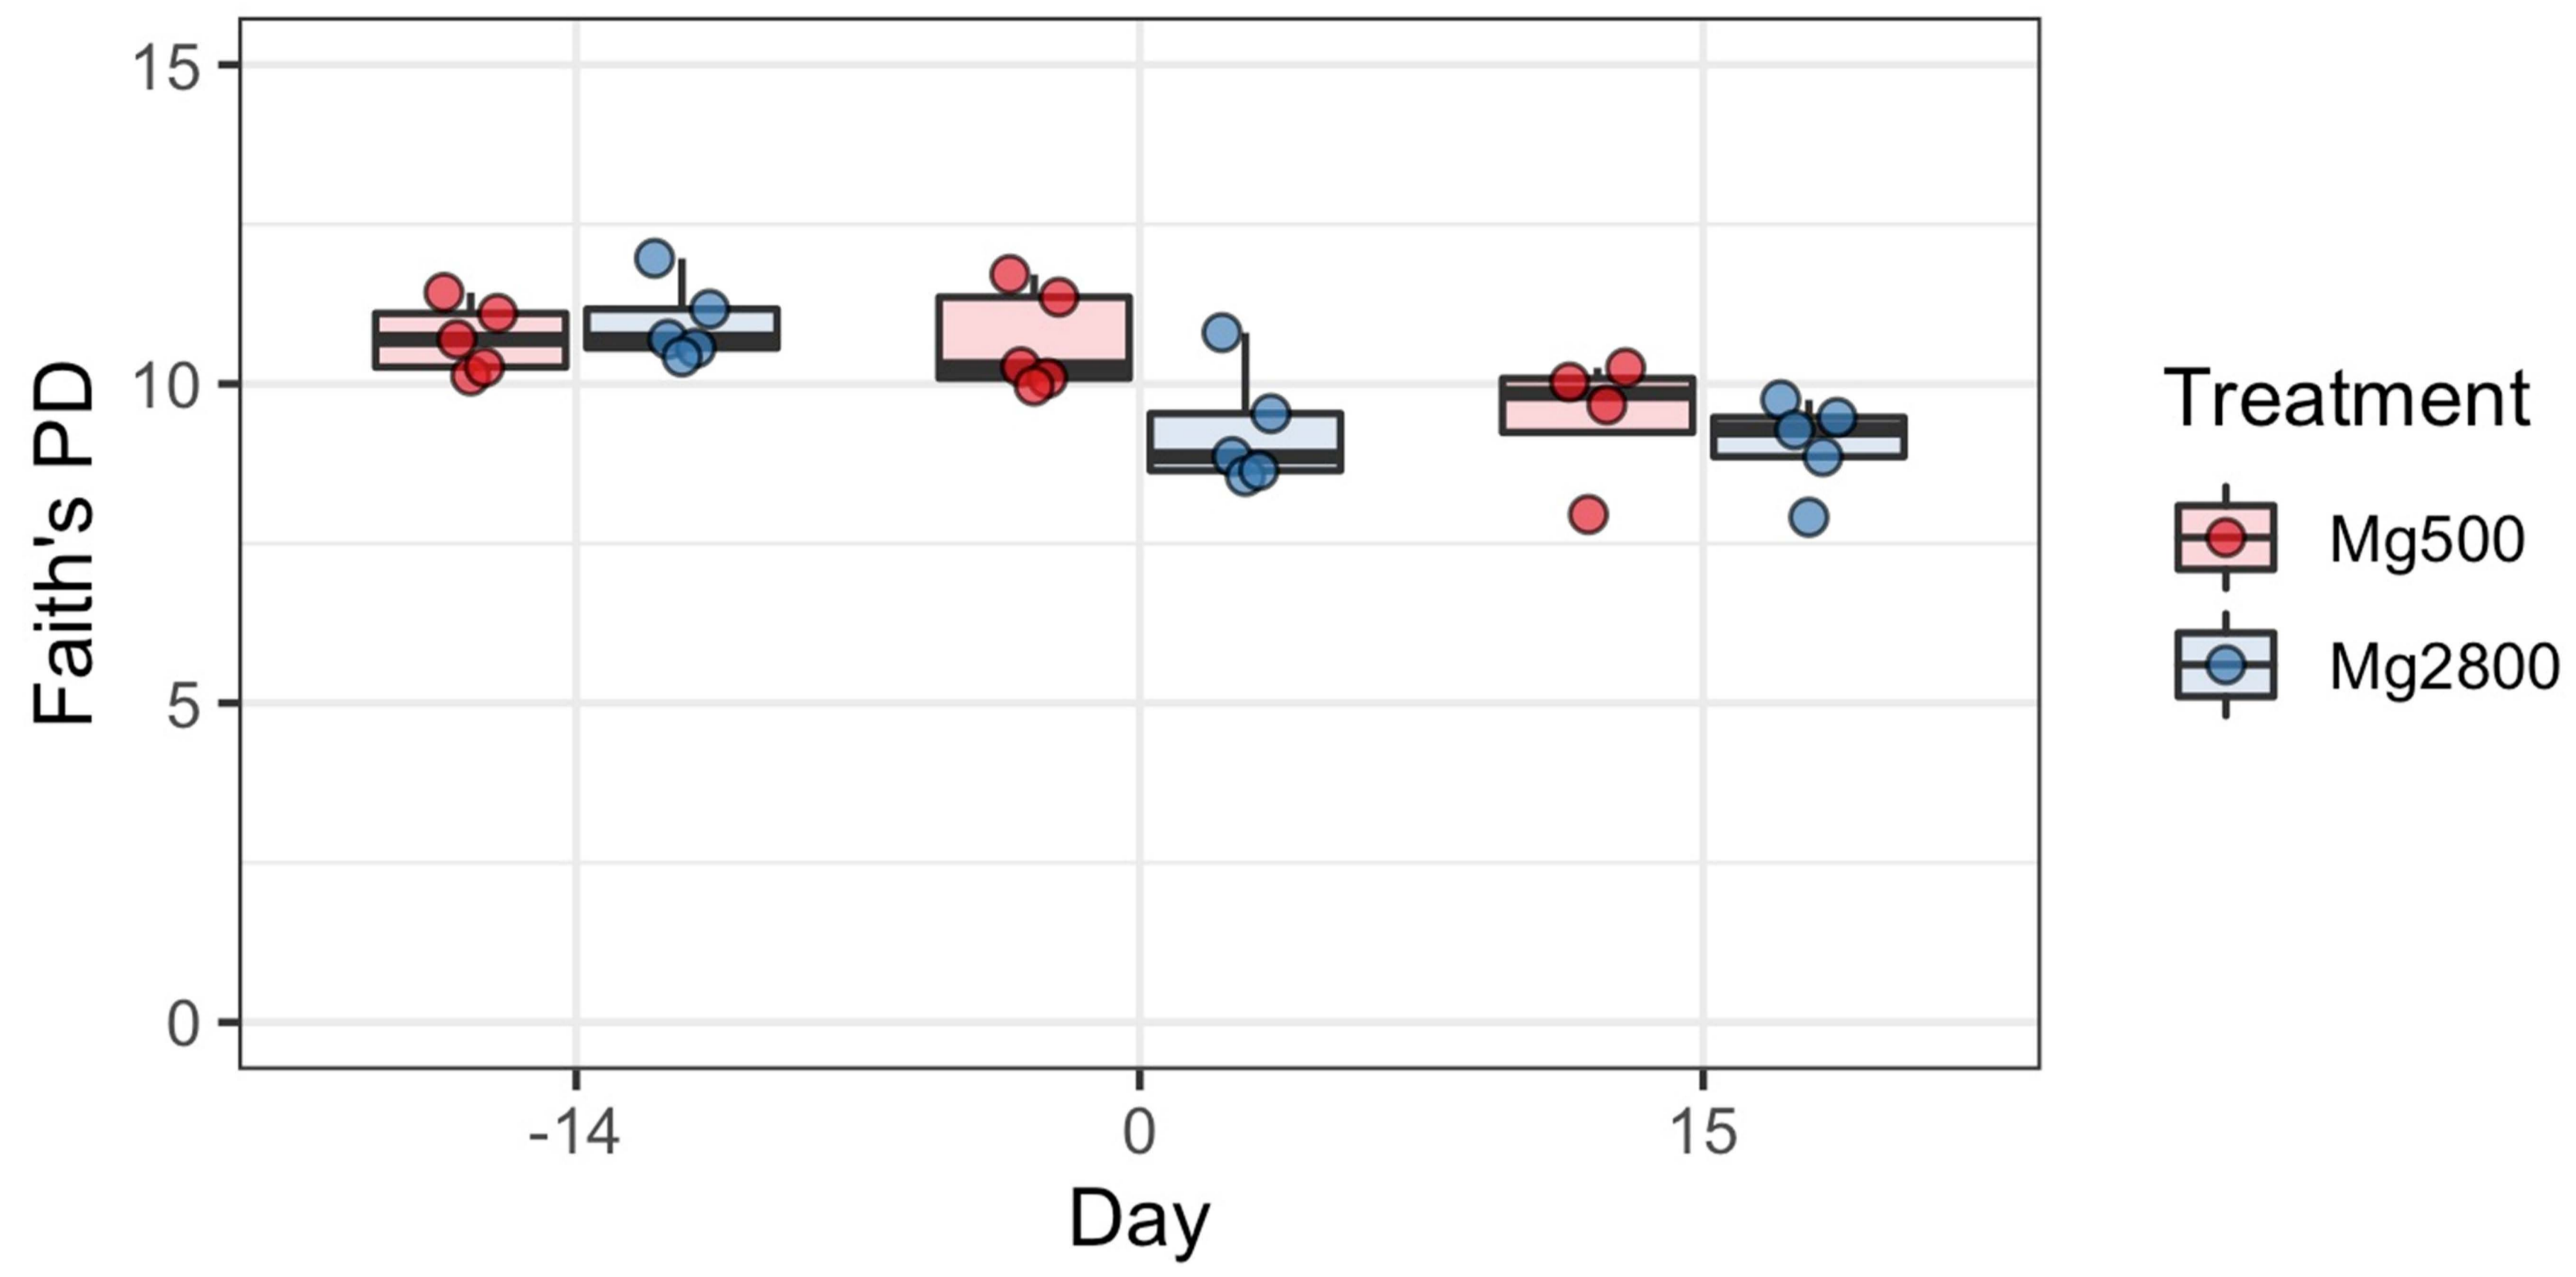**B**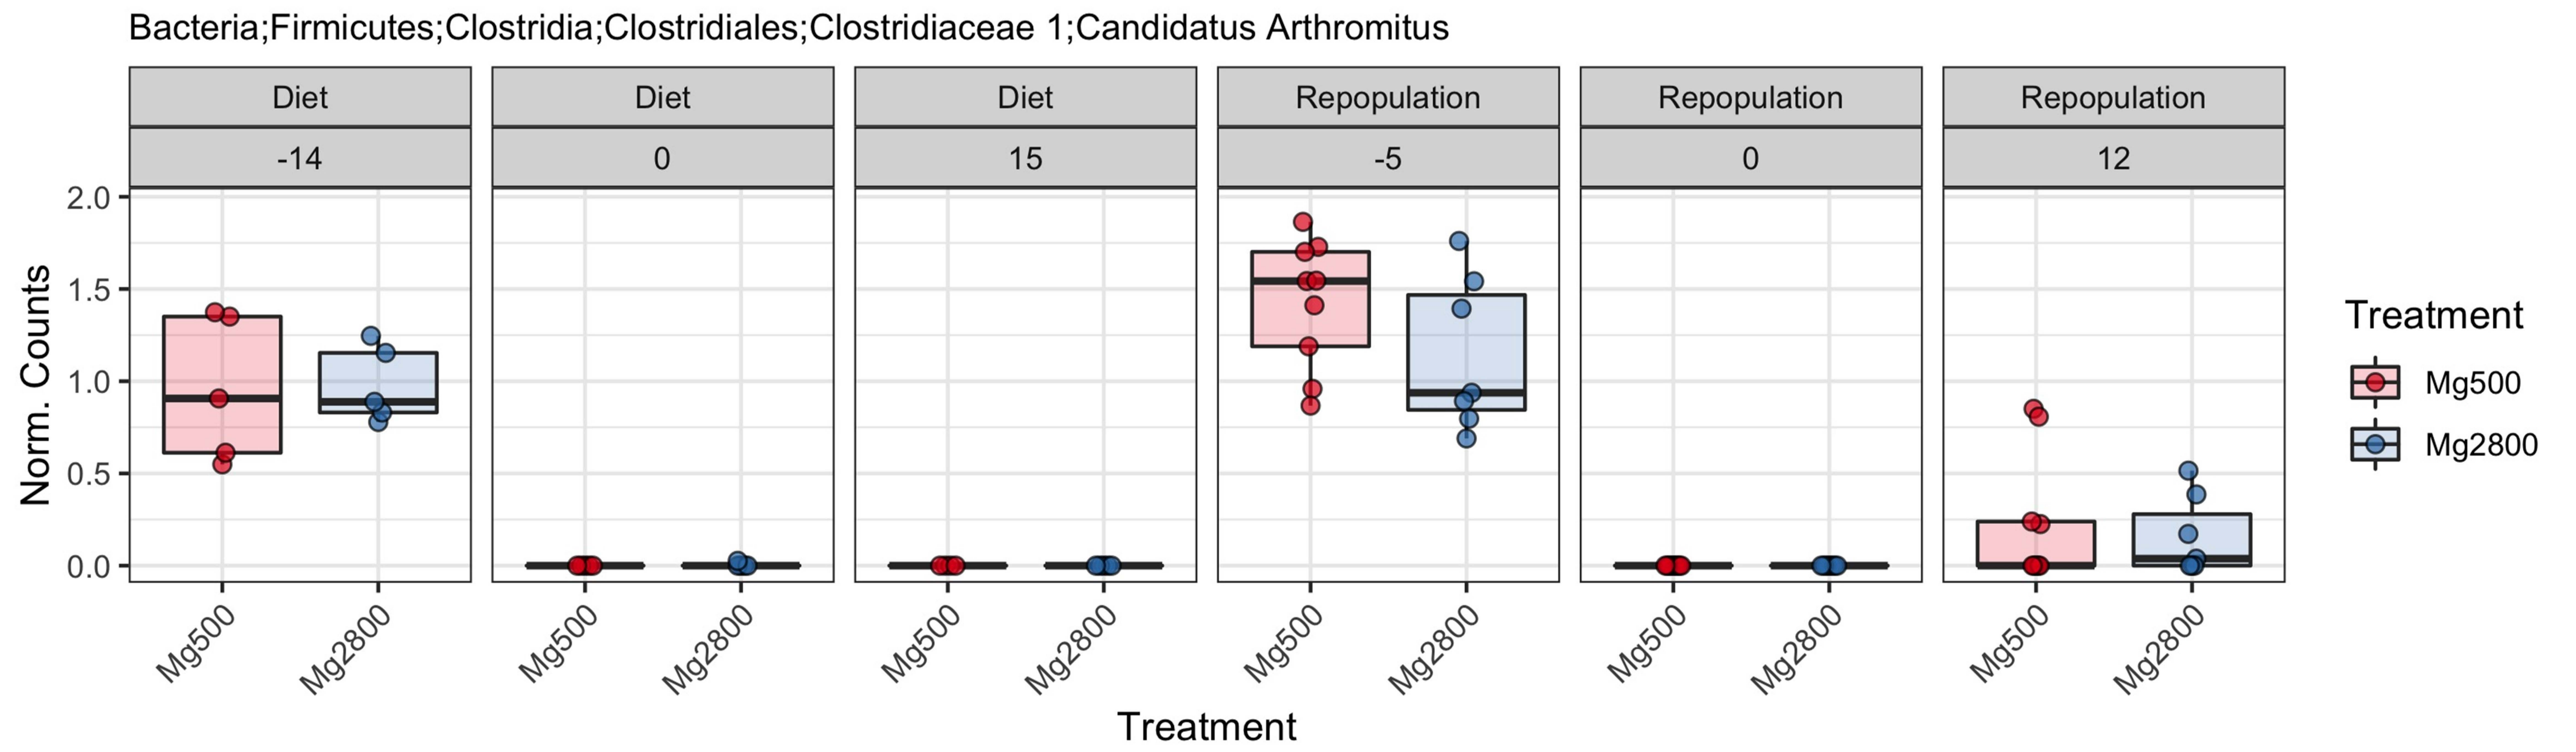

Supplement: mmc6.pdf [file mmc6.pdf]

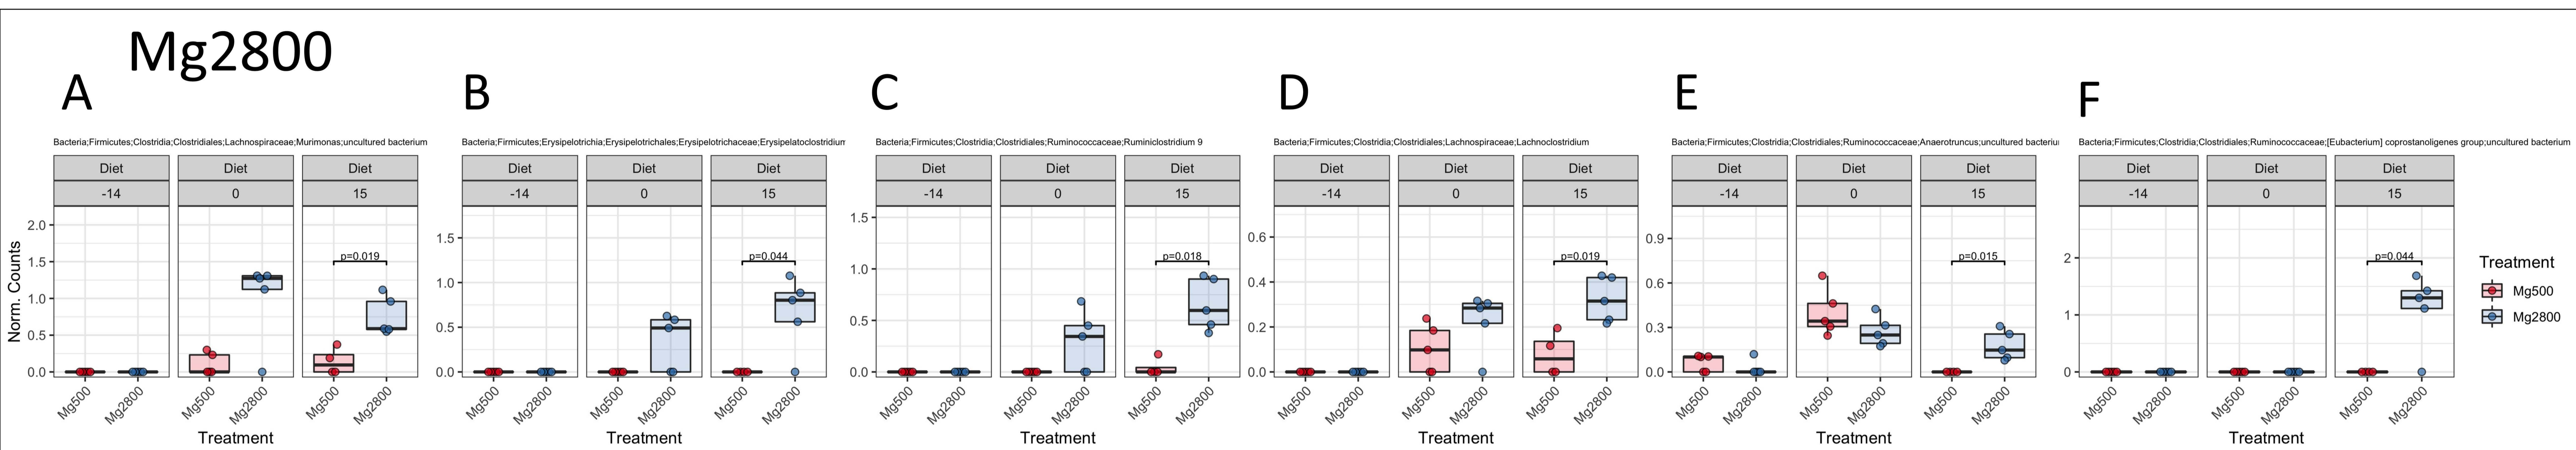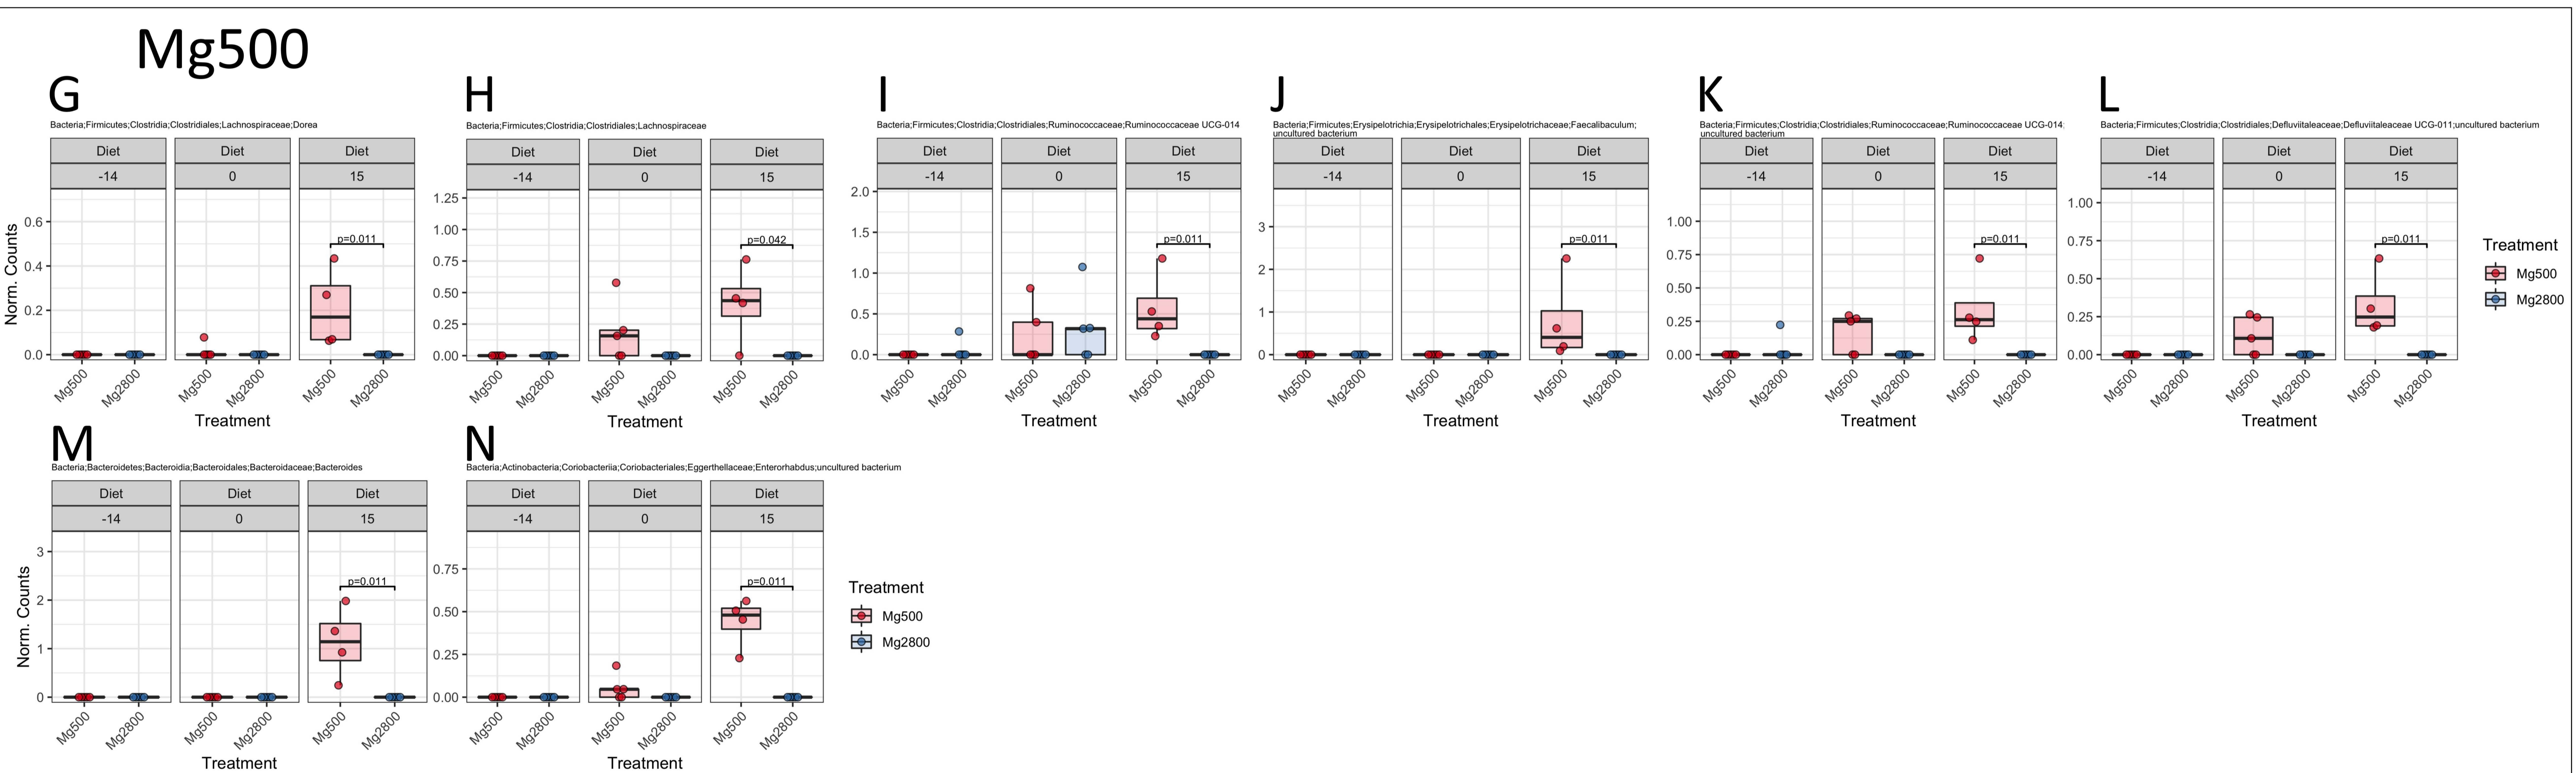

Supplement: mmc8.pdf [file mmc8.pdf]

# Mg2800

## A

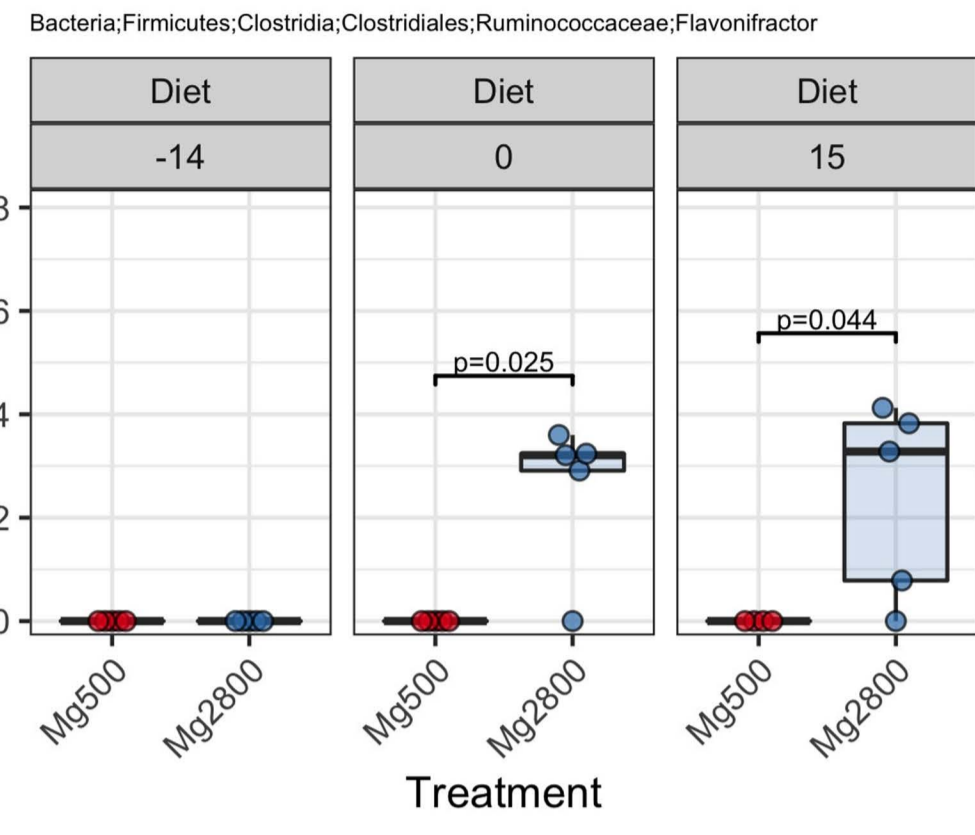

## B

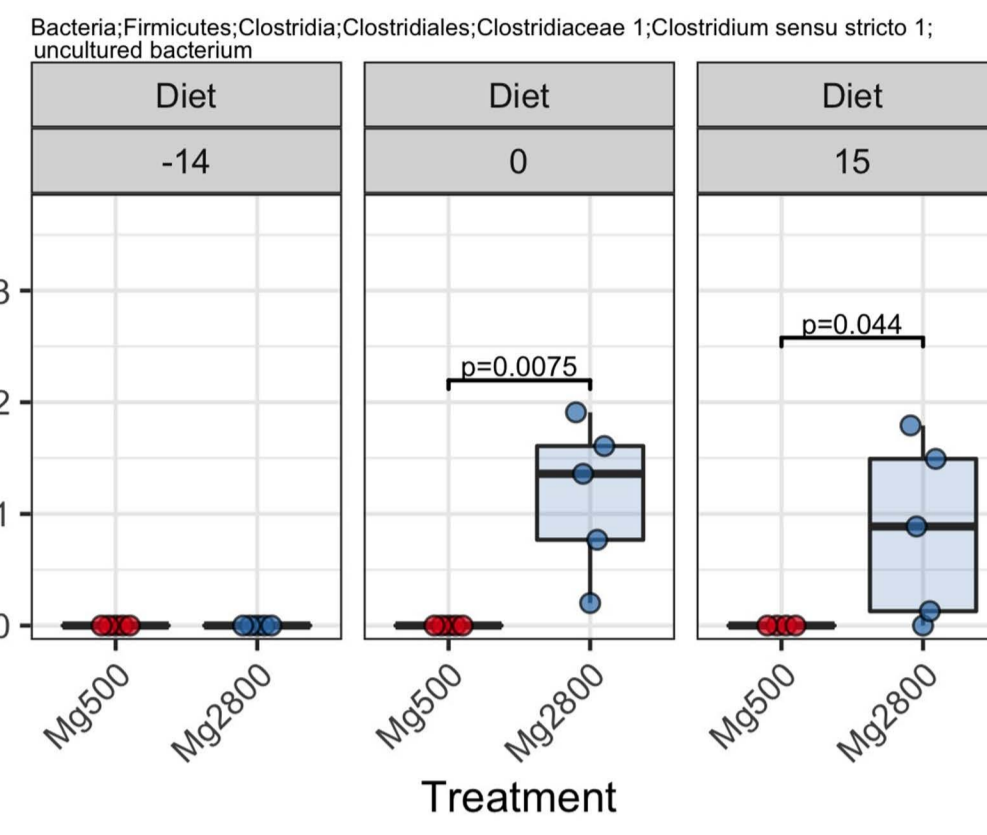

## C

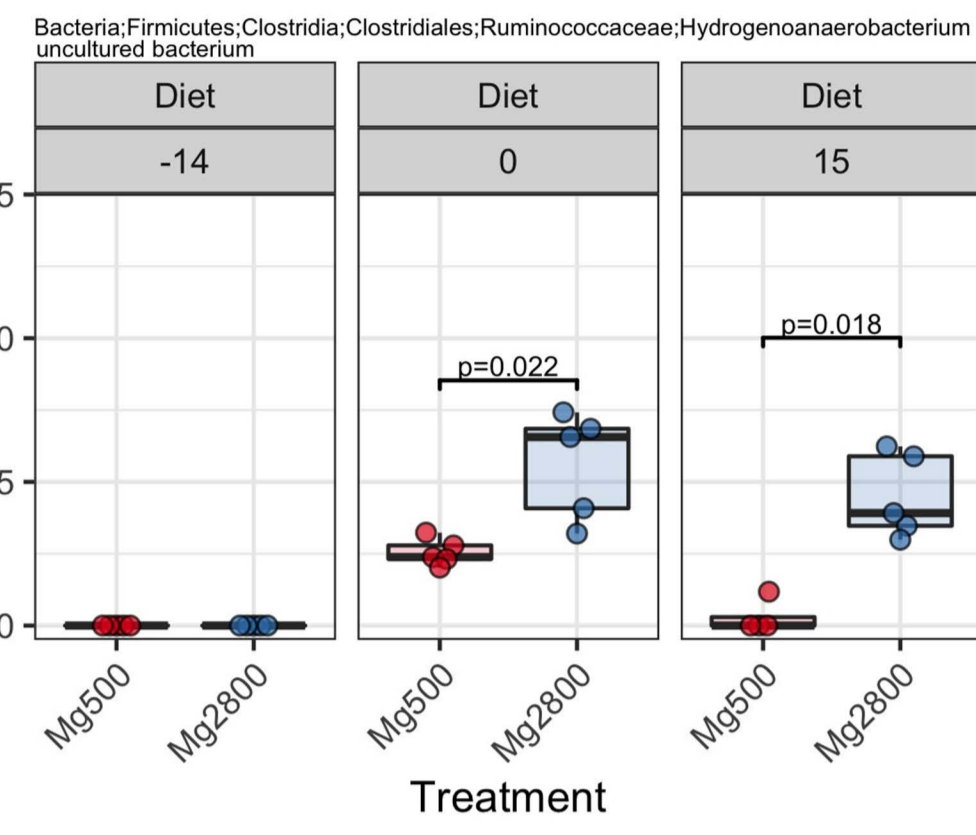

## D

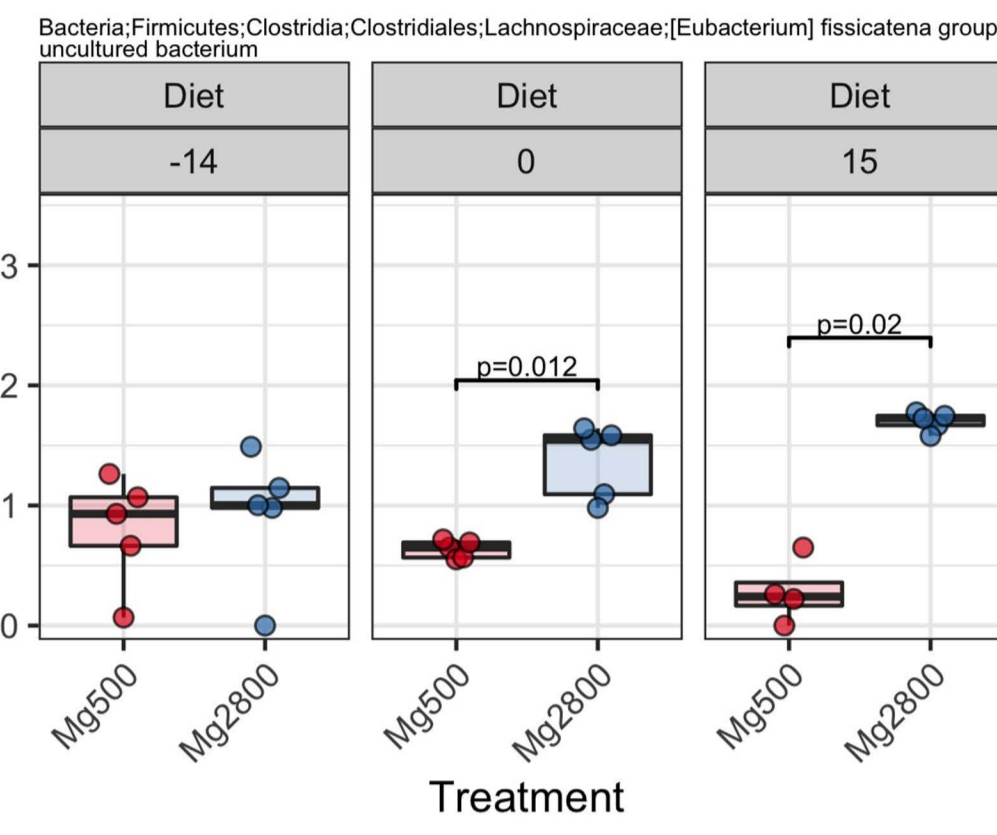

## E

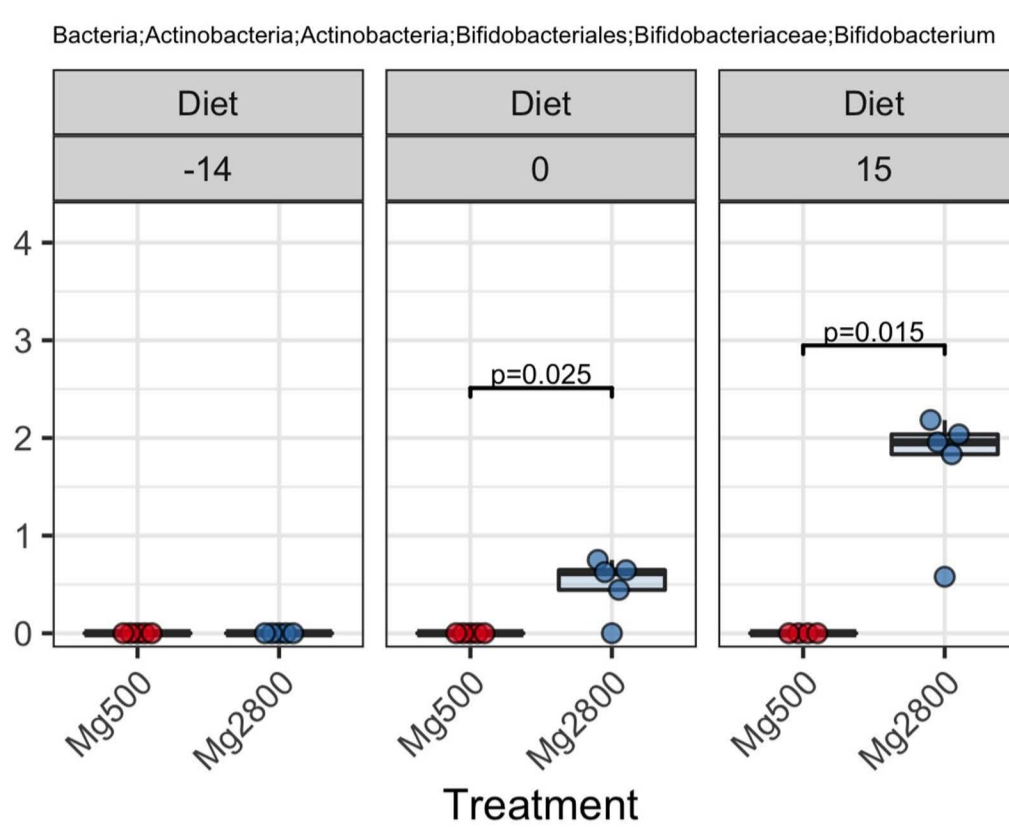

# Mg500

## F

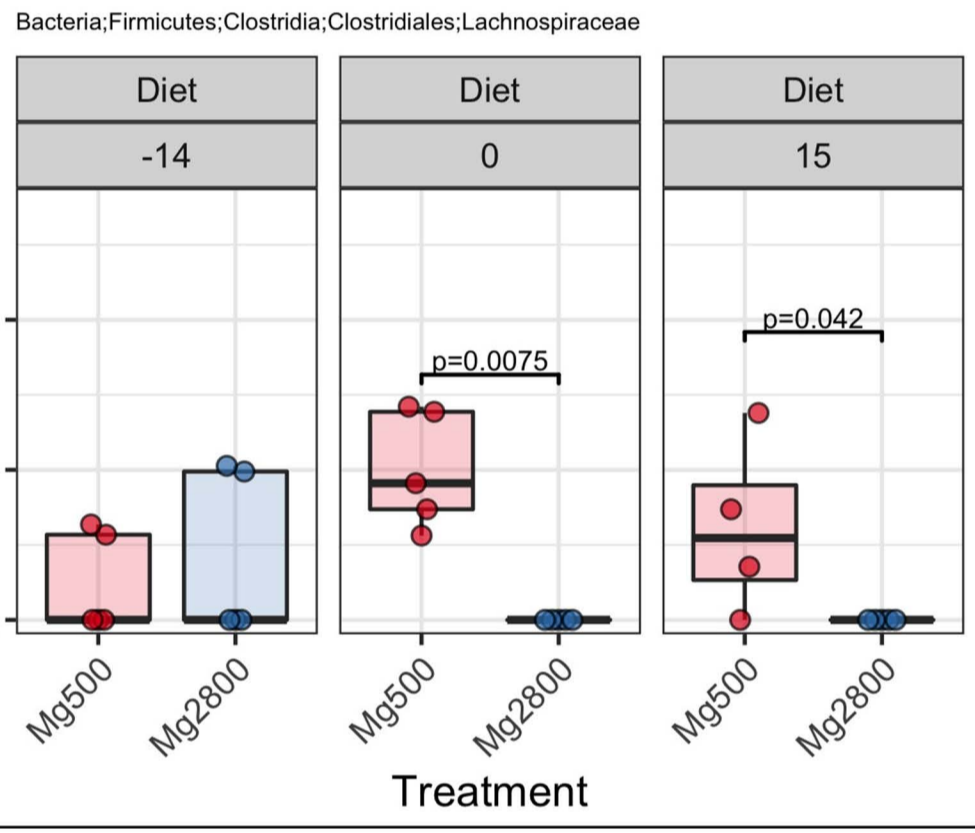

## G

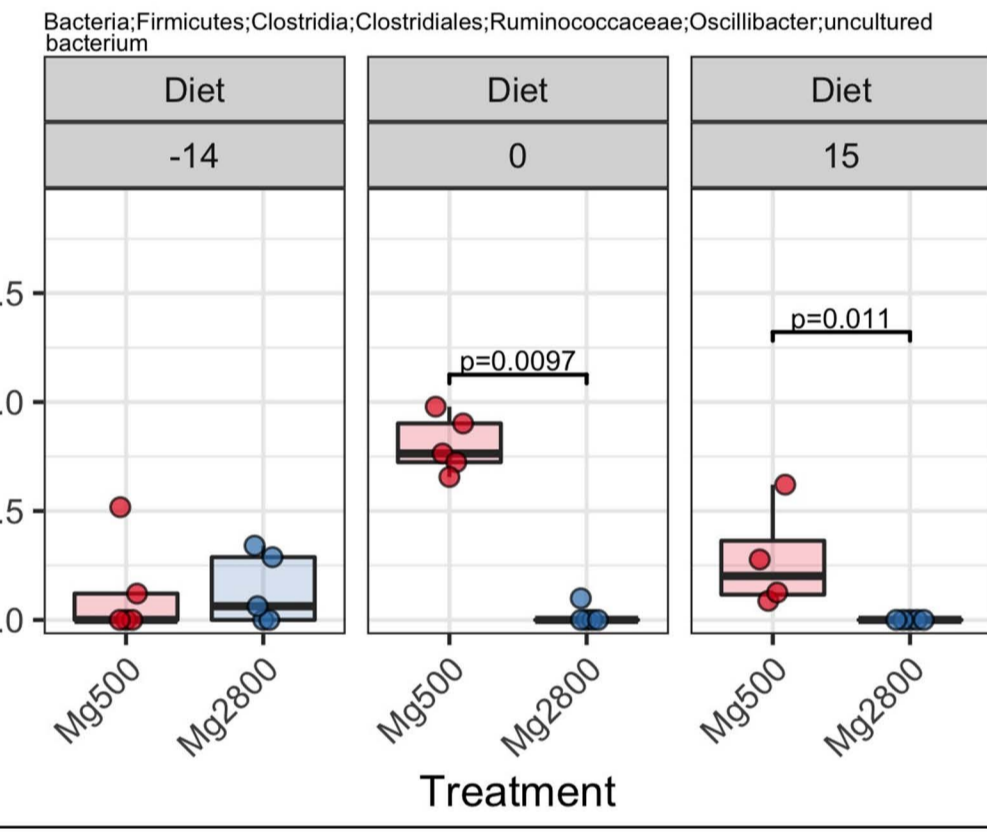

## H

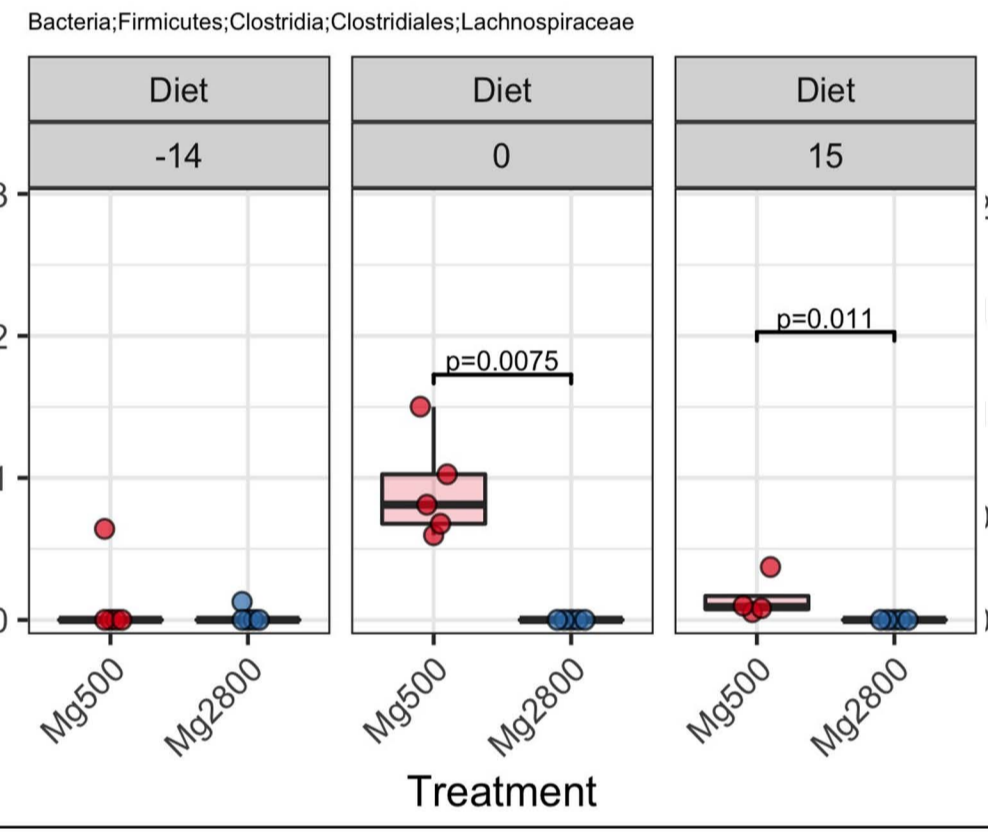

## I

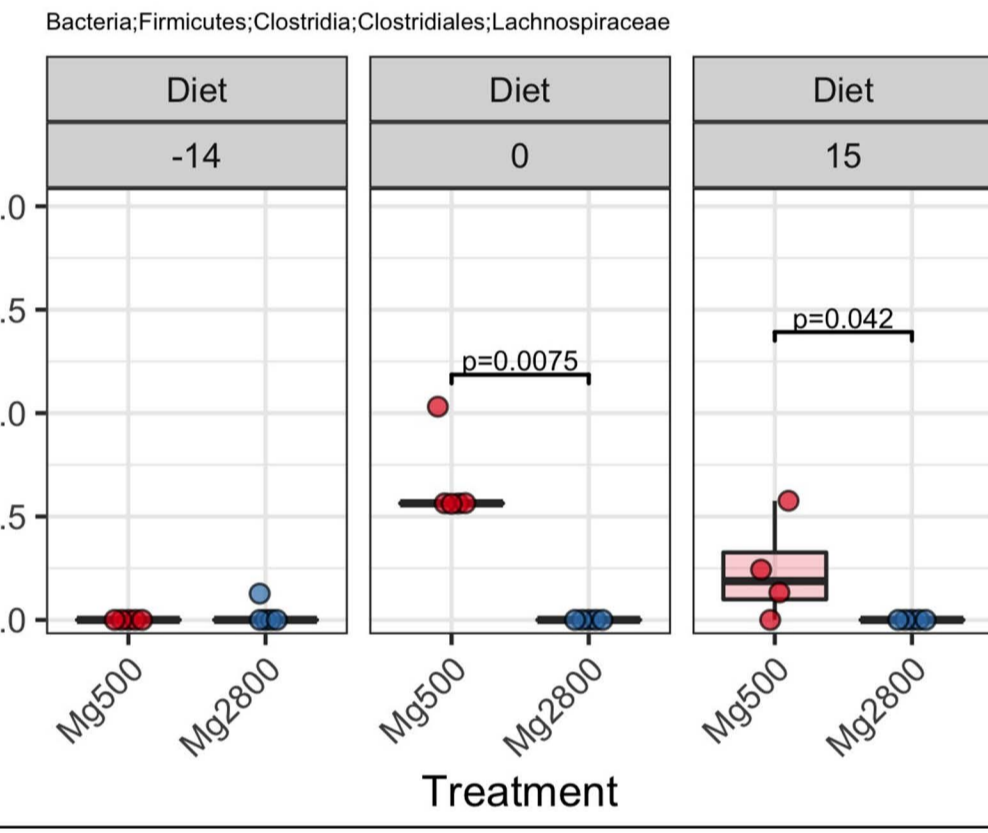

## J

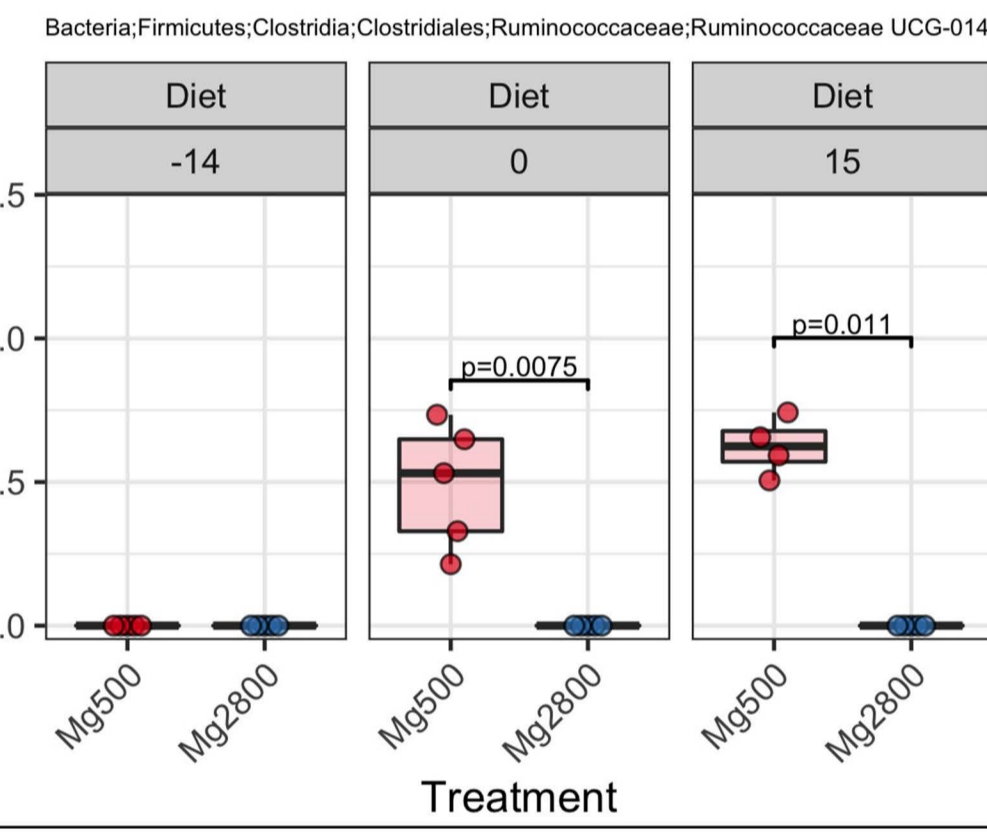

## K

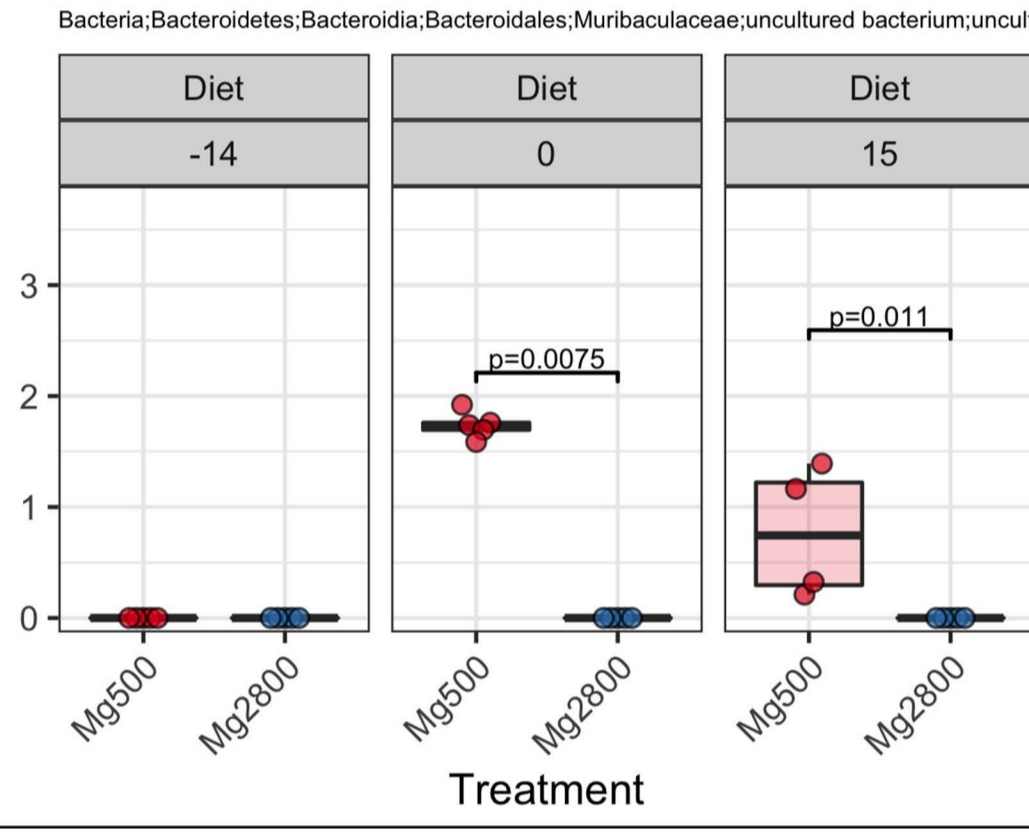

Treatment  
■ Mg500  
■ Mg2800

Supplement: mmc9.pdf [file mmc9.pdf]
